# Supplementary material for: A peroxisomal β-oxidative pathway contributes to the formation of C6–C1 aromatic volatiles in poplar
Source: PubMed Central journal article supplement (PMC8195509; doi:10.1093/plphys/kiab111), 2021-03-16
Supplement: kiab111_supplementary_data.pdf [file kiab111_supplementary_data.pdf]

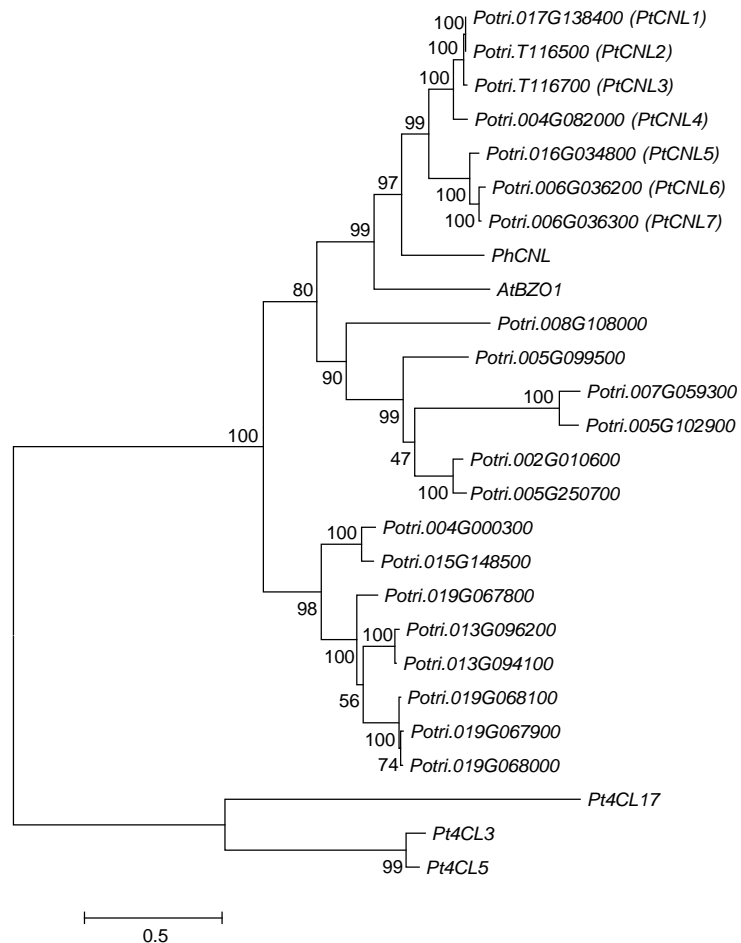

**Supplemental Figure S1. Cladogram analysis of putative poplar *cinnamate-CoA ligase (CNL)* genes, characterized poplar *4-coumarate-CoA ligase (4CL)* genes, and characterized *cinnamate-CoA ligase* genes from other plants.** The tree was inferred by using the Maximum Likelihood method based on the Tamura 3-parameter model implemented in MEGA6 (Tamura et al., 2013). Bootstrap values ( $n = 1000$ ) are shown next to each node. The tree is drawn to scale, with branch lengths measured in the number of substitutions per site. Codon positions included were 1st+2nd+3rd+Noncoding. All positions with less than 80% site coverage were eliminated. *Pt4CL3*, EU603298 (Shi et al. 2010); *Pt4CL5*, EU603299 (Shi et al. 2010); *Pt4CL17*, EU603300 (Shi et al. 2010); *AtBZO1*, NM\_105260 (Lee et al. 2012); *PhCNL*, JN120848 (Klempien et al. 2012).

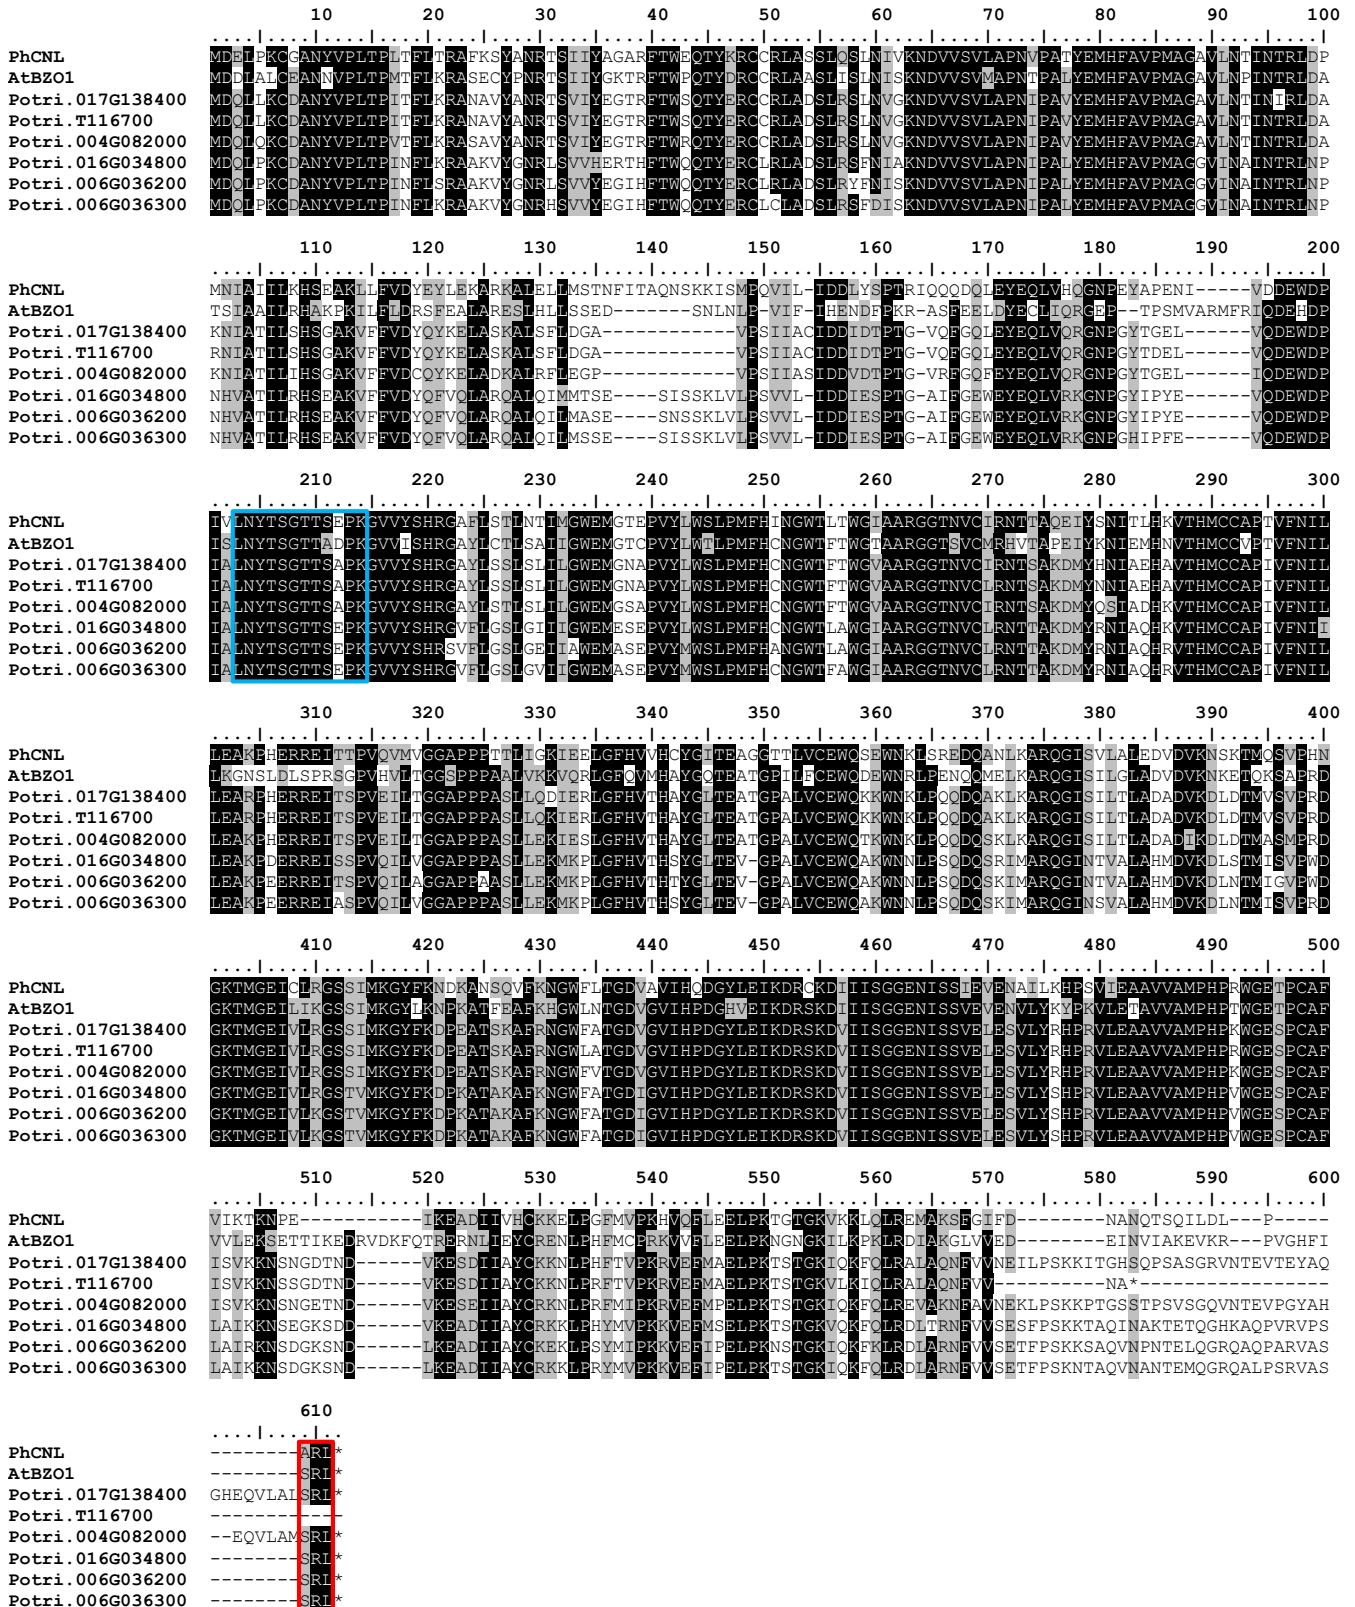

**Supplemental Figure S2. Amino acid sequence comparison of putative *Populus trichocarpa* cinnamate-CoA ligases (CNL) Potri.017G138400 (PtCNL1), Potri.T116700 (PtCNL3), Potri.004G082000 (PtCNL4), Potri.016G034800 (PtCNL5), Potri.006G036200 (PtCNL6), and Potri.006G036300 (PtCNL7) with the characterized CNL from *Petunia hybrida* (Ph) and *Arabidopsis thaliana* (AtBZO1). The amino acid alignment was computed using the MUSCLE algorithm implemented in MEGA6 (Tamura et al., 2013) and visualized with the program BioEdit (<http://www.mbio.ncsu.edu/bioedit/bioedit.html>). Black boxes mark conserved residues and gray boxes mark similar amino acids. The peroxisomal targeting sequence I (PTS I) predicted by PSORT (<https://www.psort.org/>) is highlighted in red. The putative AMP-binding site as predicted by ProSite (<https://prosite.expasy.org/scanprosite/>) is highlighted in blue. AtBZO1, NP\_176763 (Lee et al. 2012); PhCNL, AEO52693 (Klempner et al. 2012).**

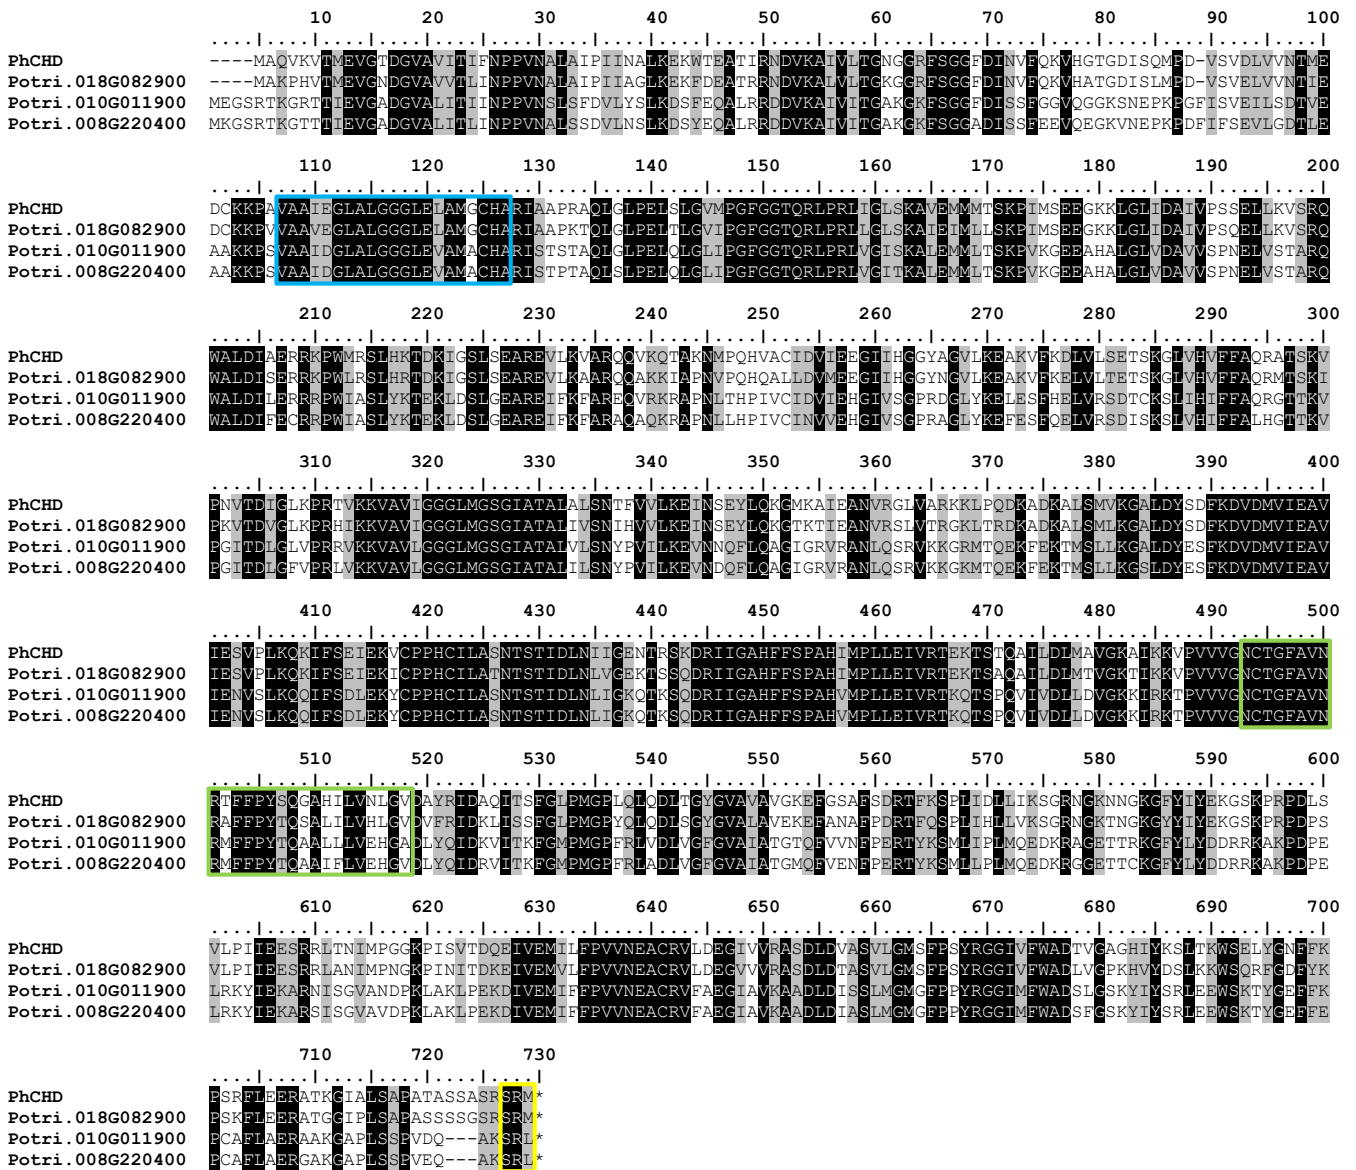

**Supplemental Figure S3. Amino acid sequence comparison of putative *Populus trichocarpa* cinnamoyl-CoA hydratases/dehydrogenases (CHD) Potri.018G082900 (PtCHD1), Potri.010G011900 (PtCHD2), and Potri.008G220400 (PtCHD3) with the characterized CHD from *Petunia hybrida* (Ph). The amino acid alignment was computed using the MUSCLE algorithm implemented in MEGA6 (Tamura et al., 2013) and visualized with the program BioEdit (<http://www.mbio.ncsu.edu/bioedit/bioedit.html>). Black boxes mark conserved residues and gray boxes mark similar amino acids. The peroxisomal targeting sequence I (PTS I) predicted by PSORT (<https://www.psort.org/>) is highlighted in yellow. Putative conserved hydratase/isomerase and dehydrogenase regions predicted by ProSite (<https://prosite.expasy.org/scanprosite/>) are highlighted in blue and green, respectively. PhCHD, AFS41246 (Qualley et al. 2012).**

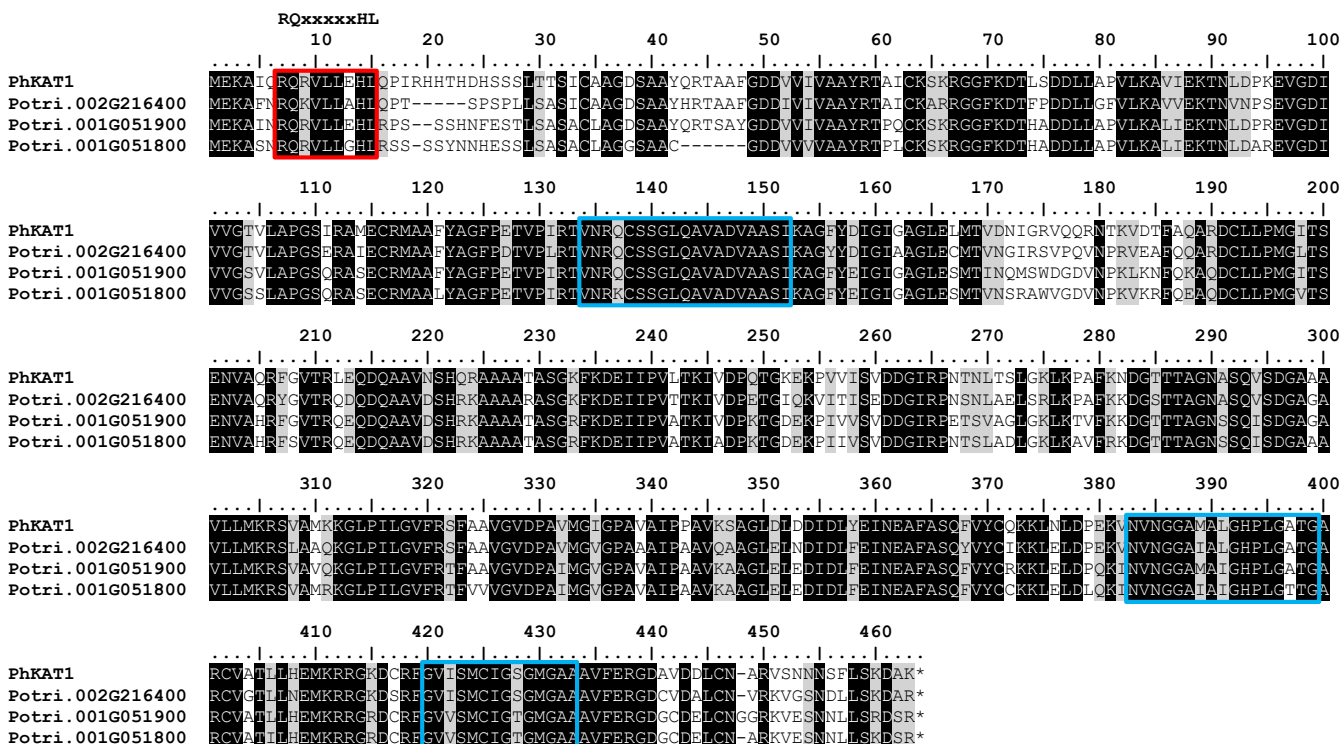

**Supplemental Figure S4. Amino acid sequence comparison of putative *Populus trichocarpa* 3-ketoacyl-CoA thiolases (KAT) Potri.002G216400 (PtKAT1), Potri.001G051900 (PtKAT2), and Potri.001G051800 (PtKAT3) with the characterized KAT1 from *Petunia hybrida* (Ph).** The amino acid alignment was computed using the MUSCLE algorithm implemented in MEGA6 (Tamura et al., 2013) and visualized with the program BioEdit (<http://www.mbio.ncsu.edu/bioedit/bioedit.html>). Black boxes mark conserved residues and gray boxes mark similar amino acids. The peroxisomal targeting sequence II (PTS II) as described by Reumann, 2004 is highlighted in red. Putative conserved regions involved in thiolase activity predicted by ProSite (<https://prosite.expasy.org/scanprosite/>) are highlighted in blue. PhKAT1, ACV70032 (Van Moerkercke et al. 2009).

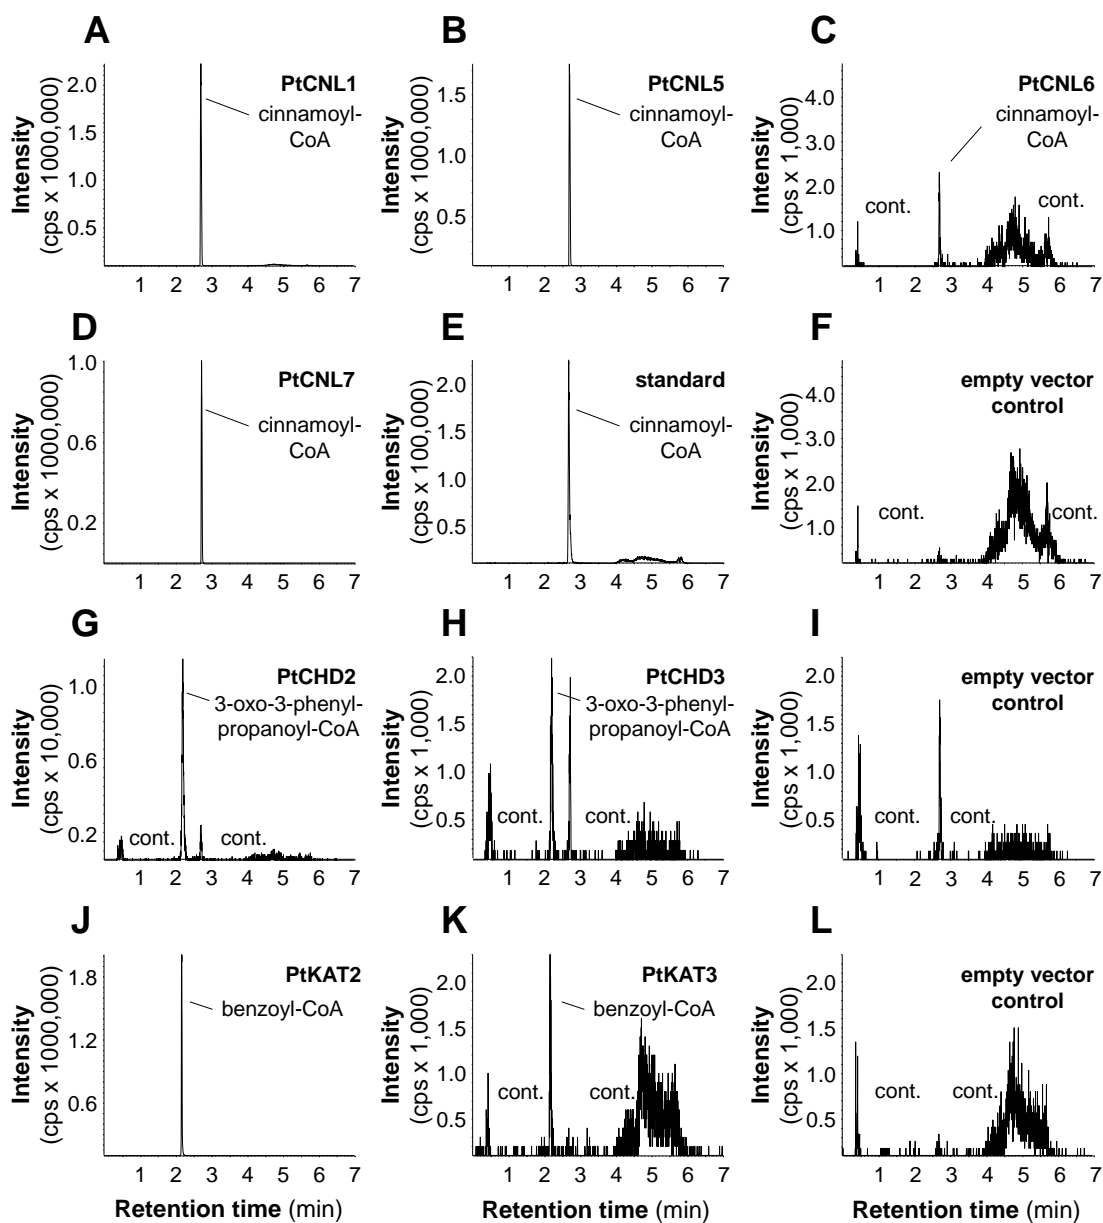

**Supplemental Figure S5. Enzymatic activity of *Populus trichocarpa* cinnamate-CoA ligases (PtCNL), cinnamoyl-CoA hydratase/dehydrogenases (PtCHD), and 3-ketoacyl-CoA thiolases (PtKAT).** Putative poplar *PtCNL*, *PtCHD*, and *PtKAT* genes were heterologously expressed in *Escherichia coli* as His<sub>6</sub>-tag fusion proteins and recombinant proteins were purified using affinity chromatography. Purified proteins were incubated with the potential substrates *trans*-cinnamic acid (PtCNL), cinnamoyl-CoA (PtCHD), cinnamoyl-CoA (+ PtCHD1) (PtKAT) and the respective cosubstrates ATP, CoA (PtCNL); NAD<sup>+</sup> (PtCHD); CoA, NAD<sup>+</sup> (PtKAT). Reaction products were analyzed using liquid chromatography/tandem mass spectrometry (LC-MS/MS). cont., contamination; cps, counts per second.

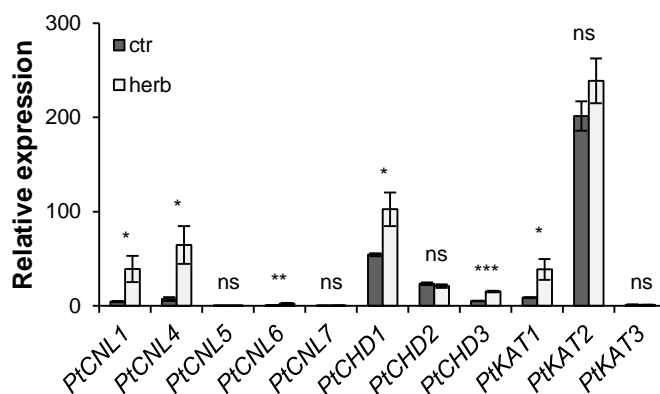

**Supplemental Figure S6. Gene expression analysis of poplar *cinnamate-CoA ligases (CNL)*, *cinnamoyl-CoA hydratases/dehydrogenases (CHD)*, and *3-ketoacyl-CoA thiolases (KAT)*.** Transcript accumulation of *PtCNL1/4-7*, *PtCHD1-3*, and *PtKAT1-3* was measured in undamaged and *Chrysomela populi*-damaged *Populus trichocarpa* leaves using RT-qPCR with *tubulin* (Wang et al. 2014) as housekeeping gene. Means and SE are shown (n = 4). Asterisks indicate statistical significance as assessed by Student's *t*-test (ST) or Mann-Whitney Rank Sum Test (MW) (\* $P < 0.05$ ; \*\* $P < 0.01$ ; \*\*\* $P < 0.001$ ). *PtCNL1* ( $P = 0.029$ ,  $T = 10.000$ , (MW)); *PtCNL4* ( $P = 0.029$ ,  $t = -2.849$ , (ST)); *PtCNL5* ( $P = 0.067$ ,  $t = -2.330$ , (ST)); *PtCNL6* ( $P = 0.002$ ,  $t = -5.447$ , (ST)); *PtCNL7* ( $P = 0.141$ ,  $t = -1.990$ , (ST)); *PtCHD1* ( $P = 0.029$ ,  $T = 10.000$ , (MW)); *PtCHD2* ( $P = 0.272$ ,  $t = 1.208$ , (ST)); *PtCHD3* ( $P < 0.001$ ,  $t = -10.939$ , (ST)); *PtKAT1* ( $P = 0.029$ ,  $T = 10.000$ , (MW)); *PtKAT2* ( $P = 0.235$ ,  $t = -1.319$ , (ST)); *PtKAT3* ( $P = 0.367$ ,  $t = 0.976$ , (ST)).

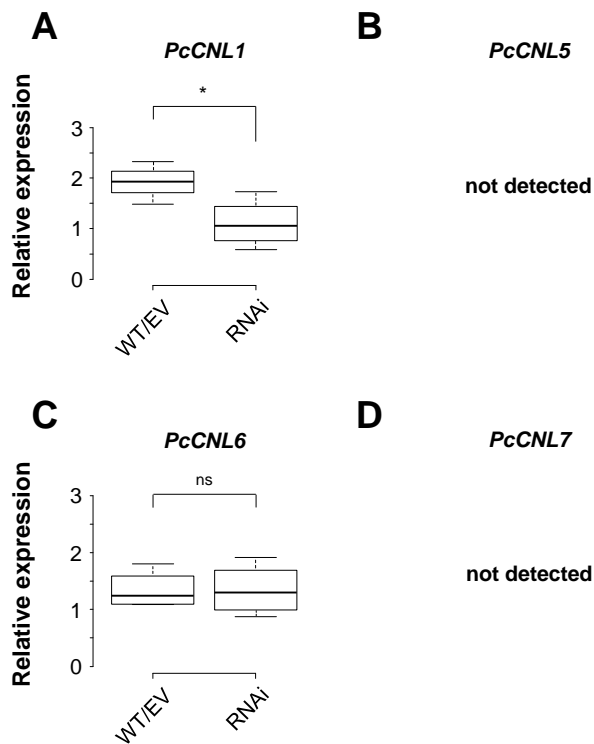

**Supplemental Figure S7. RNAi-mediated knockdown of the *cinnamate-CoA ligases (CNL1 and 4)* in *Populus x canescens*.** Transcript accumulation of *P. x canescens* *CNL1*, *CNL5*, *CNL6*, and *CNL7* in *Chrysomela populi*-damaged wild-type and transgenic *P. x canescens* trees are shown. Gene expression was measured using RT-qPCR with *ubiquitin* (Ramírez-Carvajal et al., 2007) as housekeeping gene. Medians  $\pm$  quartiles and outliers are shown ( $n = 4$  biological replicates). EV, empty vector; ns, not significant; WT, wild-type. Asterisks indicate statistical significance as assessed by Student's *t*-test (ST) ( $*P < 0.05$ ). *PcCNL1* ( $P = 0.032$ ,  $t = -2.779$ , (ST)); *PcCNL6* ( $P = 0.996$ ,  $t = 0.00543$ , (ST)).

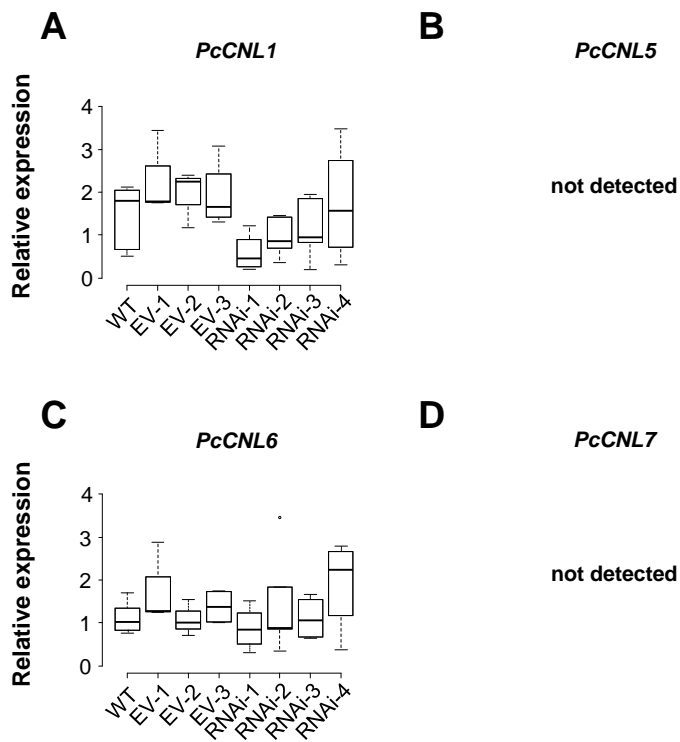

**Supplemental Figure S8. RNAi-mediated knockdown of the *cinnamate-CoA ligases (CNL1 and 4)* in *Populus x canescens*.** Transcript accumulation of *P. x canescens* *CNL1*, *CNL5*, *CNL6*, and *CNL7* in *Chrysomela populi*-damaged wild-type and transgenic *P. x canescens* trees are shown. Gene expression was measured using RT-qPCR with *ubiquitin* (Ramírez-Carvajal et al., 2007) as housekeeping gene. Medians  $\pm$  quartiles and outliers are shown (n = 3-6 technical replicates). EV, empty vector; WT, wild type.



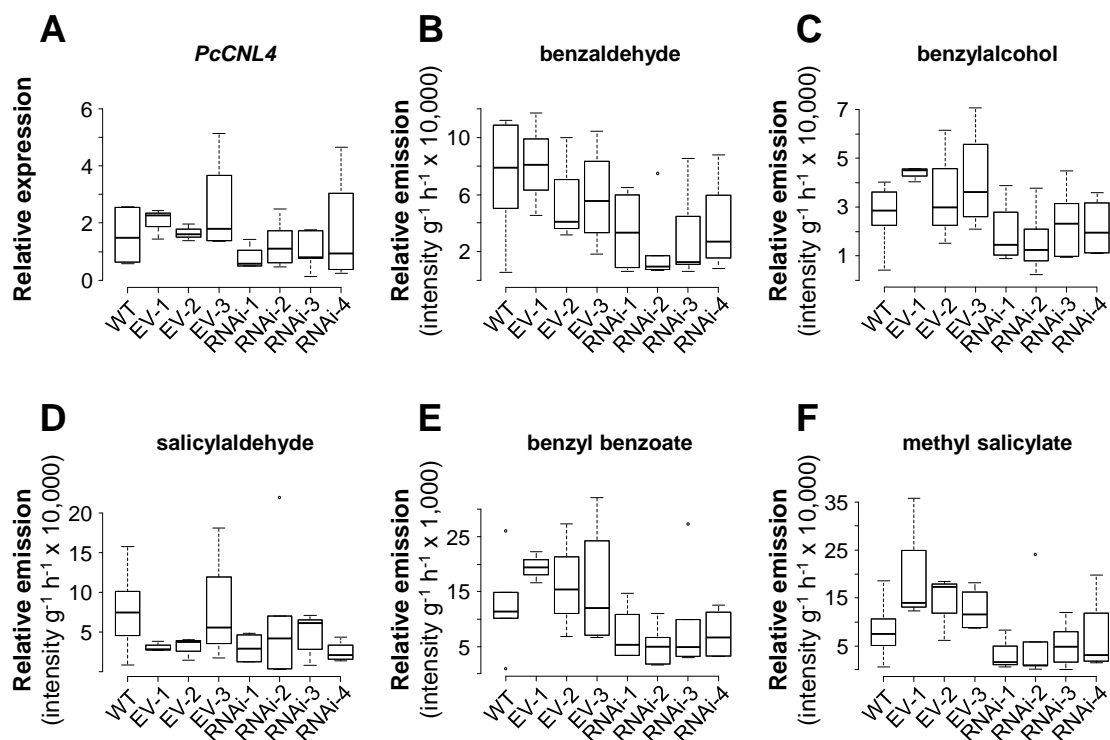

**Supplemental Figure S9. Effect of RNAi-mediated knockdown of the *cinnamate-CoA ligases* (*CNL1* and *4*) in *Populus x canescens* on the emission of aromatic compounds.** Transcript accumulation of *P. x canescens CNL4* (A), and the relative emission of benzaldehyde (B), benzylalcohol (C), salicylaldehyde (D), benzyl benzoate (E), and methyl salicylate (F) of *Chrysomela populi*-damaged wild-type and transgenic *P. x canescens* trees are shown. Gene expression was measured using RT-qPCR, with *ubiquitin* (Ramírez-Carvajal et al., 2007) as housekeeping gene. Volatiles were analyzed using GC-MS. Medians  $\pm$  quartiles, and outliers are shown ( $n = 3$ -6 technical replicates). EV, empty vector; WT, wild type.

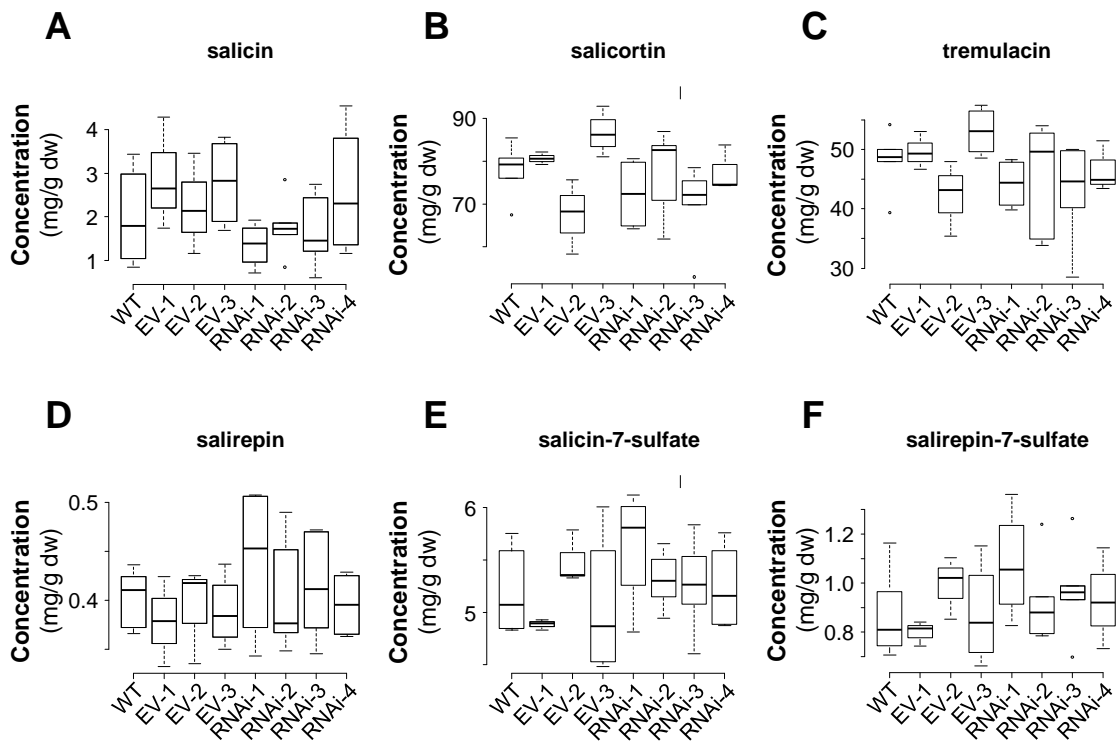

**Supplemental Figure S10. Effect of RNAi-mediated knockdown of the *cinnamate-CoA ligases* (*CNL1* and *4*) in *Populus x canescens* on the formation of salicinoids.** Concentration of salicin (A), salicortin (B), tremulacin (C), salirepin (D), salicin-7-sulfate (E), and salirepin-7-sulfate (F) in leaves of *Chrysomela populi*-damaged wild-type and transgenic *P. x canescens* trees are shown. Compounds were extracted with methanol from freeze-dried leaf material and analyzed using LC-MS/MS and HPLC-UV. Medians  $\pm$  quartiles, and outliers are shown ( $n = 3-6$  technical replicates). EV, empty vector; dw, dry weight; WT, wild type.

**Supplemental Table S1. Volatiles (ng g<sup>-1</sup> h<sup>-1</sup> fw) emitted from undamaged (control) and *Chrysomela populi*-damaged (herbivory) *Populus trichocarpa* leaves.** Compounds were collected for 6 h using a push-pull system and Poropak filter. Eluates were analyzed using GC-MS and quantified by GC-FID. Means and SE (n = 8) are given. Differences between treatments were analyzed by Student's *t*-test (ST) or Mann-Whitney Rank Sum Test (MW). fw, fresh weight, (*E*)-DMNT, (*E*)-4,8-dimethylnona-1,3,7-triene; (*E,E*)-TMTT, (*E,E*)-4,8,12-trimethyltrideca-1,3,7,11-tetraene. Compounds marked with # were identified by comparison of retention time and mass spectrum to those of authentic standards. Other compounds were identified by database comparisons.

| compound                                        | control     | herbivory     | <i>P</i> -value | <i>t</i> -value/ <i>T</i> -value |
|-------------------------------------------------|-------------|---------------|-----------------|----------------------------------|
| <b>Aromatics</b>                                |             |               |                 |                                  |
| benzaldehyde <sup>#</sup>                       | 0.28 ± 0.10 | 20.22 ± 9.07  | <0.001          | 36.000 (MW)                      |
| benzylalcohol <sup>#</sup>                      | 2.13 ± 0.40 | 21.13 ± 3.59  | <0.001          | 36.000 (MW)                      |
| 2-phenylethanol <sup>#</sup> / <i>(E)</i> -DMNT | 0.00 ± 0.00 | 85.01 ± 10.63 | <0.001          | 36.000 (MW)                      |
| salicylaldehyde <sup>#</sup>                    | 3.11 ± 1.17 | 20.23 ± 7.91  | 0.007           | 43.000 (MW)                      |
| methyl salicylate <sup>#</sup>                  | 0.62 ± 0.16 | 1.37 ± 0.27   | 0.031           | -2.398 (ST)                      |
| salicylalcohol                                  | 0.00 ± 0.00 | 17.55 ± 4.03  | <0.001          | 36.000 (MW)                      |
| eugenol                                         | 0.46 ± 0.13 | 1.35 ± 0.24   | 0.006           | -3.258 (ST)                      |
| isoamyl benzoate                                | 0.00 ± 0.00 | 0.44 ± 0.06   | <0.001          | 36.000 (MW)                      |
| <i>cis</i> -3-hexenyl benzoate <sup>#</sup>     | 0.47 ± 0.11 | 5.37 ± 1.36   | <0.001          | 36.000 (MW)                      |
| hexenyl benzoate/ <i>(E,E)</i> -TMTT            | 0.39 ± 0.19 | 14.58 ± 3.18  | <0.001          | 36.000 (MW)                      |
| benzyl benzoate <sup>#</sup>                    | 0.91 ± 0.25 | 2.91 ± 0.92   | 0.036           | -2.315 (ST)                      |
| <b>Nitrogenous compounds</b>                    |             |               |                 |                                  |
| <i>(E)</i> -3-methylbutyraldoxime               | 0.00 ± 0.00 | 39.19 ± 7.87  | <0.001          | 36.000 (MW)                      |
| <i>(Z)</i> -3-methylbutyraldoxime               | 0.00 ± 0.00 | 23.75 ± 3.55  | <0.001          | 36.000 (MW)                      |
| <i>(E)</i> -2-methylbutyraldoxime               | 0.00 ± 0.00 | 45.44 ± 7.10  | <0.001          | 36.000 (MW)                      |
| <i>(Z)</i> -2-methylbutyraldoxime               | 0.00 ± 0.00 | 12.03 ± 1.79  | <0.001          | 36.000 (MW)                      |
| benzyl cyanide                                  | 0.49 ± 0.16 | 50.71 ± 7.62  | <0.001          | 36.000 (MW)                      |
| <i>(E)</i> -phenylacetaldoxime                  | 0.00 ± 0.00 | 5.16 ± 0.80   | <0.001          | 36.000 (MW)                      |
| <i>(Z)</i> -phenylacetaldoxime                  | 0.00 ± 0.00 | 4.77 ± 0.83   | <0.001          | 36.000 (MW)                      |
| indole                                          | 0.15 ± 0.08 | 27.33 ± 4.27  | <0.001          | 36.000 (MW)                      |
| 2-phenylnitroethane                             | 0.00 ± 0.00 | 11.00 ± 1.84  | <0.001          | 36.000 (MW)                      |
| <b>Green leaf volatiles</b>                     |             |               |                 |                                  |
| 1-hexanol                                       | 0.00 ± 0.00 | 22.55 ± 4.27  | <0.001          | 36.000 (MW)                      |

**Supplemental Table S1. continued**

| <b>compound</b>                             | <b>control</b>    | <b>herbivory</b>     | <b>P-value</b> | <b>t-value/T-value</b> |
|---------------------------------------------|-------------------|----------------------|----------------|------------------------|
| <b><i>Monoterpenoids</i></b>                |                   |                      |                |                        |
| $\alpha$ -pinene <sup>#</sup>               | 8.97 $\pm$ 2.31   | 10.91 $\pm$ 2.18     | 0.442          | 60.000 (MW)            |
| sabinene                                    | 5.84 $\pm$ 1.43   | 9.77 $\pm$ 2.09      | 0.130          | 53.000 (MW)            |
| $\beta$ -pinene <sup>#</sup>                | 2.79 $\pm$ 0.72   | 4.24 $\pm$ 0.91      | 0.105          | 52.000 (MW)            |
| <i>p</i> -cymene                            | 1.72 $\pm$ 0.38   | 3.48 $\pm$ 0.49      | 0.012          | -2.876 (ST)            |
| limonene <sup>#</sup>                       | 3.51 $\pm$ 1.08   | 5.54 $\pm$ 1.14      | 0.217          | -1.294 (ST)            |
| 1,8-cineole                                 | 24.08 $\pm$ 6.06  | 58.75 $\pm$ 11.38    | 0.018          | -2.690 (ST)            |
| ( <i>Z</i> )- $\beta$ -ocimene              | 0.00 $\pm$ 0.00   | 19.79 $\pm$ 4.29     | <0.001         | 36.000 (MW)            |
| ( <i>E</i> )- $\beta$ -ocimene <sup>#</sup> | 6.66 $\pm$ 2.44   | 355.94 $\pm$ 86.77   | <0.001         | 36.000 (MW)            |
| $\alpha$ -terpineol <sup>#</sup>            | 3.13 $\pm$ 0.81   | 9.01 $\pm$ 2.12      | 0.021          | -2.589 (ST)            |
| <b><i>Sesquiterpenoids</i></b>              |                   |                      |                |                        |
| $\alpha$ -copaene                           | 3.60 $\pm$ 1.10   | 5.98 $\pm$ 1.12      | 0.083          | 51.000 (MW)            |
| calarene                                    | 1.24 $\pm$ 0.35   | 2.16 $\pm$ 0.43      | 0.116          | -1.676 (ST)            |
| $\beta$ -cubebene                           | 1.23 $\pm$ 0.40   | 2.12 $\pm$ 0.40      | 0.141          | -1.561 (ST)            |
| $\alpha$ -amorphene                         | 4.19 $\pm$ 1.18   | 7.62 $\pm$ 1.42      | 0.065          | 50.000 (MW)            |
| ( <i>Z,E</i> )- $\alpha$ -farnesene         | 2.14 $\pm$ 0.41   | 16.91 $\pm$ 2.64     | <0.001         | 36.000 (MW)            |
| $\gamma$ -cadinene                          | 3.41 $\pm$ 0.96   | 6.02 $\pm$ 1.17      | 0.065          | 50.000 (MW)            |
| $\delta$ -cadinene                          | 8.07 $\pm$ 2.34   | 14.90 $\pm$ 3.03     | 0.065          | 50.000 (MW)            |
| cadinol                                     | 1.86 $\pm$ 0.37   | 4.30 $\pm$ 0.81      | 0.016          | -2.751 (ST)            |
| ( <i>E,E</i> )- $\alpha$ -farnesene         | 64.79 $\pm$ 15.02 | 1192.88 $\pm$ 192.07 | <0.001         | 36.000 (MW)            |

**Supplemental Table S2. Content of non-polar benzenoid compounds ( $\mu\text{g/g}$  fresh weight) in undamaged (control) and *Chrysomela populi*-damaged (herbivory) *Populus trichocarpa* leaves.** Compounds were extracted with hexane from fresh plant material and analyzed using GC-MS/GC-FID. Means and SE (n = 8) are given. Differences between treatments were analyzed by Student's *t*-test (ST) or Mann-Whitney Rank Sum Test (MW).

| <b>compound</b> | <b>control</b>   | <b>herbivory</b> | <b><i>P</i>-value</b> | <b>t-value/<i>T</i>-value</b> |
|-----------------|------------------|------------------|-----------------------|-------------------------------|
| benzaldehyde    | 0.14 $\pm$ 0.01  | 0.18 $\pm$ 0.01  | 0.028                 | 47.000 (MW)                   |
| benzylalcohol   | 0.51 $\pm$ 0.10  | 0.80 $\pm$ 0.12  | 0.038                 | 48.000 (MW)                   |
| salicylaldehyde | 18.49 $\pm$ 2.33 | 27.82 $\pm$ 3.07 | 0.030                 | -2.419 (ST)                   |
| benzyl benzoate | 0.50 $\pm$ 0.08  | 1.53 $\pm$ 0.25  | <0.001                | 36.000 (MW)                   |

**Supplemental Table S3. Aromatic amino acid and aromatic carboxylic acid content ( $\mu\text{g/g}$  dry weight) in undamaged (control) and *Chrysomela populi*-damaged (herbivory) *Populus trichocarpa* leaves.** Compounds were extracted with methanol from freeze-dried plant material and analyzed using LC-MS/MS. NA, not available; nd, not detected. Means and SE (n = 8) are given. Differences between treatments were analyzed by Student's *t*-test (ST) or Mann-Whitney Rank Sum Test (MW).

| <b>compound</b>             | <b>control</b>   | <b>herbivory</b> | <b>P-value</b> | <b>t-value/T-value</b> |
|-----------------------------|------------------|------------------|----------------|------------------------|
| phenylalanine               | 19.80 $\pm$ 1.21 | 32.69 $\pm$ 2.29 | <0.001         | -4.969 (ST)            |
| tyrosine                    | 7.37 $\pm$ 0.53  | 8.60 $\pm$ 0.69  | 0.176          | -1.425 (ST)            |
| tryptophan                  | 10.76 $\pm$ 1.32 | 71.67 $\pm$ 7.75 | <0.001         | 36.000 (MW)            |
| <i>trans</i> -cinnamic acid | 37.59 $\pm$ 5.19 | 38.79 $\pm$ 4.03 | 0.857          | -0.813 (ST)            |
| 2-hydroxycinnamic acid      | nd               | nd               | NA             | NA                     |
| 4-hydroxycinnamic acid      | 2.96 $\pm$ 0.24  | 5.00 $\pm$ 0.23  | <0.001         | -6.161 (ST)            |
| caffeic acid                | 1.73 $\pm$ 0.10  | 3.40 $\pm$ 0.38  | <0.001         | 36.000 (MW)            |
| ferulic acid                | 0.45 $\pm$ 0.02  | 0.71 $\pm$ 0.04  | <0.001         | -5.285 (ST)            |
| gallic acid                 | 1.29 $\pm$ 0.07  | 1.42 $\pm$ 0.07  | 0.205          | -1.330 (ST)            |
| benzoic acid                | nd               | nd               | NA             | NA                     |
| 3-hydroxybenzoic acid       | 3.80 $\pm$ 0.29  | 4.02 $\pm$ 0.30  | 0.600          | -0.536 (ST)            |
| 4-hydroxybenzoic acid       | 1.38 $\pm$ 0.08  | 3.30 $\pm$ 0.41  | <0.001         | 36.000 (MW)            |
| 2,3-dihydroxybenzoic acid   | 0.00 $\pm$ 0.00  | 0.56 $\pm$ 0.24  | 0.010          | 44.000 (MW)            |
| 2,5-dihydroxybenzoic acid   | 0.00 $\pm$ 0.00  | 0.50 $\pm$ 0.18  | <0.001         | 36.000 (MW)            |

**Supplemental Table S4. Phytohormone content (ng/g dry weight) in undamaged (control) and *Chrysomela populi*-damaged (herbivory) *Populus trichocarpa* leaves.** Compounds were extracted with methanol from freeze-dried plant material and analyzed using LC-MS/MS. Means and SE (n = 8) are given. Differences between treatments were analyzed by Student's *t*-test (ST) or Mann-Whitney Rank Sum Test (MW).

| <b>compound</b>                               | <b>control</b>  | <b>herbivory</b>  | <b>P-value</b> | <b>t-value/T-value</b> |
|-----------------------------------------------|-----------------|-------------------|----------------|------------------------|
| salicylic acid                                | 624.33 ± 118.65 | 969.23 ± 176.28   | 0.105          | -1.735 (ST)            |
| jasmonic acid                                 | 125.56 ± 22.90  | 855.31 ± 122.91   | <0.001         | 36.000 (MW)            |
| abscisic acid                                 | 94.88 ± 6.40    | 130.78 ± 8.81     | 0.003          | -3.524 (ST)            |
| (-)-jasmonoyl-L-<br>isoleucine                | 1.23 ± 0.22     | 15.23 ± 1.87      | <0.001         | 36.000 (MW)            |
| (+)-7- <i>iso</i> -jasmonoyl-L-<br>isoleucine | 3.38 ± 0.57     | 72.25 ± 8.19      | <0.001         | 36.000 (MW)            |
| 12-oxophytodienoic acid                       | 194.40 ± 30.57  | 503.30 ± 69.88    | <0.001         | -4.330 (ST)            |
| 12-hydroxyjasmonic acid                       | 252.04 ± 64.33  | 6908.47 ± 1396.15 | <0.001         | 36.000 (MW)            |
| 12-hydroxyjasmonic acid-<br>isoleucine        | 8.61 ± 1.50     | 213.18 ± 32.68    | <0.001         | 36.000 (MW)            |
| 12-carboxyjasmonic acid-<br>isoleucine        | 0.00 ± 0.00     | 16.04 ± 2.27      | <0.001         | 36.000 (MW)            |

**Supplemental Table S5. Incorporation of D<sub>7</sub>-cinnamic acid (D<sub>7</sub>-CA) into aromatic carboxylic acids in *Chrysomela populi*-damaged *Populus trichocarpa* leaves.** Compounds were extracted with methanol from freeze-dried plant material and analyzed using LC-MS/MS. The amount of each compound, labeled and unlabeled, is given as the percentage of the total amount of that compound. nd, not detected. Means and SE (n = 3 - 4) are given.

| <b>compound</b>                        | <b>H<sub>2</sub>O control (%)</b> | <b>D<sub>7</sub>CA feeding (%)</b> |
|----------------------------------------|-----------------------------------|------------------------------------|
| cinnamic acid                          | 100 ± 0.0                         | 3.9 ± 1.6                          |
| D <sub>7</sub> -cinnamic acid          | nd                                | 96.1 ± 1.6                         |
| 2-hydroxycinnamic acid                 | nd                                | nd                                 |
| D <sub>6</sub> -2-hydroxycinnamic acid | nd                                | nd                                 |
| 4-hydroxycinnamic acid                 | 100 ± 0.0                         | 39.3 ± 19.4                        |
| D <sub>6</sub> -4-hydroxycinnamic acid | nd                                | 60.7 ± 19.4                        |
| caffeic acid                           | 100 ± 0.0                         | 74.2 ± 10.9                        |
| D <sub>5</sub> -caffeic acid           | nd                                | 25.8 ± 10.9                        |
| ferulic acid                           | 100 ± 0.0                         | 78.7 ± 4.2                         |
| D <sub>5</sub> -ferulic acid           | nd                                | 21.3 ± 4.2                         |
| benzoic acid (BA)                      | nd                                | nd                                 |
| D <sub>5</sub> -benzoic acid           | nd                                | nd                                 |
| salicylic acid                         | 100 ± 0.0                         | 95.3 ± 1.3                         |
| D <sub>4</sub> -salicylic acid         | nd                                | 4.7 ± 1.3                          |
| 3-hydroxy BA                           | nd                                | nd                                 |
| D <sub>4</sub> -3-hydroxy BA           | nd                                | nd                                 |
| 4-hydroxy BA                           | nd                                | nd                                 |
| D <sub>4</sub> -4-hydroxy BA           | nd                                | nd                                 |
| 2,3 dihydroxy BA                       | nd                                | nd                                 |
| D <sub>3</sub> -2,3 dihydroxy BA       | nd                                | nd                                 |
| 2,5 dihydroxy BA                       | 100 ± 0.0                         | 94.5 ± 1.1                         |
| D <sub>3</sub> -2,5 dihydroxy BA       | nd                                | 5.5 ± 1.1                          |
| gallic acid                            | 100 ± 0.0                         | 100 ± 0.0                          |
| D <sub>2</sub> -gallic acid            | nd                                | nd                                 |



**Supplemental Table S6. Predicted subcellular localization of poplar cinnamate-CoA ligases (PtCNL).** <sup>1</sup> <https://rostlab.org/services/loctree3/>; <sup>2</sup> <http://www.cbs.dtu.dk/services/DeepLoc-1.0/>, (Almagro Armenteros et al. 2017); <sup>3</sup> <https://mendel.imp.ac.at/pts1/>, (Neuberger et al. 2003a, Neuberger et al. 2003b); <sup>4</sup> <http://ppp.gobics.de/>, (Reumann et al. 2012); <sup>5</sup> <http://www.cbs.dtu.dk/services/TargetP-2.0/>, (Almagro Armenteros et al. 2019); <sup>6</sup> <http://www.csbio.sjtu.edu.cn/bioinf/plant-multi/>, (Chou, 2004; Chou and Shen, 2007, 2008, 2010; Shen and Chou, 2006).

| Prediction software         | Predicted location                                                                  |                                     |                                     |                                     |                                     |                                     |
|-----------------------------|-------------------------------------------------------------------------------------|-------------------------------------|-------------------------------------|-------------------------------------|-------------------------------------|-------------------------------------|
|                             | PtCNL1                                                                              | PtCNL3                              | PtCNL4                              | PtCNL5                              | PtCNL6                              | PtCNL7                              |
| LocTree3 <sup>1</sup>       | Peroxisome (Expected accuracy: 88%)                                                 | Peroxisome (Expected accuracy: 88%) | Peroxisome (Expected accuracy: 88%) | Peroxisome (Expected accuracy: 88%) | Peroxisome (Expected accuracy: 87%) | Peroxisome (Expected accuracy: 87%) |
| DeepLoc-1.0 <sup>2</sup>    | Peroxisome (Likelihood 0.60)                                                        | Peroxisome (Likelihood 0.52)        | Peroxisome (Likelihood 0.57)        | Peroxisome (Likelihood 0.57)        | Peroxisome (Likelihood 0.56)        | Peroxisome (Likelihood 0.58)        |
| PTS1 Predictor <sup>3</sup> | PTS1 targeting (score 8.59)                                                         | No PTS1 targeting (score -40.00)    | PTS1 targeting (score 6.49)         | PTS1 targeting (score 13.27)        | PTS1 targeting (score 13.79)        | PTS1 targeting (score 13.88)        |
| PredPlantPTS1 <sup>4</sup>  | PTS1 domain                                                                         | No PTS1 domain                      | PTS1 domain                         | PTS1 domain                         | PTS1 domain                         | PTS1 domain                         |
| TargetP-2.0 <sup>5</sup>    | No mitochondrial transfer peptide/No chloroplast transfer peptide/No signal peptide |                                     |                                     |                                     |                                     |                                     |
| Plant-mPLOC <sup>6</sup>    | Peroxisome                                                                          | Peroxisome                          | Peroxisome                          | Peroxisome                          | Peroxisome                          | Peroxisome                          |

**references:**

- Almagro Armenteros JJ, Salvatore M, Emanuelsson O, Winther O, von Heijne G, Elofsson A, Nielsen H (2019) Detecting sequence signals in targeting peptides using deep learning. *Life Sci Alliance* **2**: e201900429
- Almagro Armenteros JJ, Sønderby CK, Sønderby SK, Nielsen H, Winther O (2017) DeepLoc: prediction of protein subcellular localization using deep learning. *Bioinformatics* **33**: 3387-3395
- Chou K-C (2004) Using amphiphilic pseudo amino acid composition to predict enzyme subfamily classes. *Bioinformatics* **21**: 10-19
- Chou K-C, Shen H-B (2007) Large-scale plant protein subcellular location prediction. *J Cell Biochem* **100**: 665-678
- Chou K-C, Shen H-B (2008) Cell-PLOC: a package of Web servers for predicting subcellular localization of proteins in various organisms. *Nat Protoc* **3**: 153-162
- Chou K-C, Shen H-B (2010) Plant-mPLOC: A top-down strategy to augment the power for predicting plant protein subcellular localization. *PLOS ONE* **5**: e11335
- Neuberger G, Maurer-Stroh S, Eisenhaber B, Hartig A, Eisenhaber F (2003a) Motif refinement of the Peroxisomal Targeting Signal 1 and evaluation of taxon-specific differences. *J Mol Biol* **328**: 567-579
- Neuberger G, Maurer-Stroh S, Eisenhaber B, Hartig A, Eisenhaber F (2003b) Prediction of Peroxisomal Targeting Signal 1 containing proteins from amino acid sequence. *J Mol Biol* **328**: 581-592
- Reumann S, Buchwald D, Lingner T (2012) PredPlantPTS1: A web server for the prediction of plant peroxisomal proteins. *Front Plant Sci* **3**: 194
- Shen H-B, Chou K-C (2006) Ensemble classifier for protein fold pattern recognition. *Bioinformatics* **22**: 1717-1722

**Supplemental Table S7. Predicted subcellular localization of poplar cinnamoyl-CoA hydratases/dehydrogenases (PtCHD) and 3-ketoacyl-CoA thiolases (PtKAT).** <sup>1</sup> <https://roslab.org/services/loctree3/>; <sup>2</sup> <http://www.cbs.dtu.dk/services/DeepLoc-1.0/>, (Almagro Armenteros et al. 2017); <sup>3</sup> <https://mendel.imp.ac.at/pts1/>, (Neuberger et al. 2003a, Neuberger et al. 2003b); <sup>4</sup> <http://ppp.gobics.de/>, (Reumann et al. 2012); <sup>5</sup> <http://www.cbs.dtu.dk/services/TargetP-2.0/>, (Almagro Armenteros et al. 2019); <sup>6</sup> <http://www.csbio.sjtu.edu.cn/bioinf/plant-multi/>, (Chou, 2004; Chou and Shen, 2007, 2008, 2010; Shen and Chou, 2006).

| Prediction software         | Predicted location                                                                  |                                     |                                     |                                     |                                     |                                     |
|-----------------------------|-------------------------------------------------------------------------------------|-------------------------------------|-------------------------------------|-------------------------------------|-------------------------------------|-------------------------------------|
|                             | PtCHD1                                                                              | PtCHD2                              | PtCHD3                              | PtKAT1                              | PtKAT2                              | PtKAT3                              |
| LocTree3 <sup>1</sup>       | Peroxisome (Expected accuracy: 89%)                                                 | Peroxisome (Expected accuracy: 96%) | Peroxisome (Expected accuracy: 95%) | Peroxisome (Expected accuracy: 95%) | Peroxisome (Expected accuracy: 96%) | Peroxisome (Expected accuracy: 96%) |
| DeepLoc-1.0 <sup>2</sup>    | Peroxisome (Likelihood 0.98)                                                        | Peroxisome (Likelihood 0.98)        | Peroxisome (Likelihood 0.98)        | Peroxisome (Likelihood 0.61)        | Peroxisome (Likelihood 0.59)        | Peroxisome (Likelihood 0.60)        |
| PTS1 Predictor <sup>3</sup> | PTS1 targeting (score 9.04)                                                         | PTS1 targeting (score 13.27)        | PTS1 targeting (score 12.13)        | No PTS1 targeting (score -42.79)    | No PTS1 targeting (score -35.04)    | No PTS1 targeting (score -34.84)    |
| PredPlantPTS1 <sup>4</sup>  | PTS1 domain                                                                         | PTS1 domain                         | PTS1 domain                         | No PTS1 domain                      | No PTS1 domain                      | No PTS1 domain                      |
| TargetP-2.0 <sup>5</sup>    | No mitochondrial transfer peptide/No chloroplast transfer peptide/No signal peptide |                                     |                                     |                                     |                                     |                                     |
| Plant-mPLoc <sup>6</sup>    | Peroxisome                                                                          | Peroxisome                          | Peroxisome                          | Peroxisome                          | Peroxisome                          | Peroxisome                          |

**references:**

- Almagro Armenteros JJ, Salvatore M, Emanuelsson O, Winther O, von Heijne G, Elofsson A, Nielsen H (2019) Detecting sequence signals in targeting peptides using deep learning. *Life Sci Alliance* **2**: e201900429
- Almagro Armenteros JJ, Sønderby CK, Sønderby SK, Nielsen H, Winther O (2017) DeepLoc: prediction of protein subcellular localization using deep learning. *Bioinformatics* **33**: 3387-3395
- Chou K-C (2004) Using amphiphilic pseudo amino acid composition to predict enzyme subfamily classes. *Bioinformatics* **21**: 10-19
- Chou K-C, Shen H-B (2007) Large-scale plant protein subcellular location prediction. *J Cell Biochem* **100**: 665-678
- Chou K-C, Shen H-B (2008) Cell-PLoc: a package of Web servers for predicting subcellular localization of proteins in various organisms. *Nat Protoc* **3**: 153-162
- Chou K-C, Shen H-B (2010) Plant-mPLoc: A top-down strategy to augment the power for predicting plant protein subcellular localization. *PLOS ONE* **5**: e11335
- Neuberger G, Maurer-Stroh S, Eisenhaber B, Hartig A, Eisenhaber F (2003a) Motif refinement of the Peroxisomal Targeting Signal 1 and evaluation of taxon-specific differences. *J Mol Biol* **328**: 567-579
- Neuberger G, Maurer-Stroh S, Eisenhaber B, Hartig A, Eisenhaber F (2003b) Prediction of Peroxisomal Targeting Signal 1 containing proteins from amino acid sequence. *J Mol Biol* **328**: 581-592
- Reumann S, Buchwald D, Lingner T (2012) PredPlantPTS1: A web server for the prediction of plant peroxisomal proteins. *Front Plant Sci* **3**: 194
- Shen H-B, Chou K-C (2006) Ensemble classifier for protein fold pattern recognition. *Bioinformatics* **22**: 1717-1722

**Supplemental Table S8. Enzymatic activity of *Populus trichocarpa* cinnamate-CoA ligases (PtCNL) assayed with different substrates.** Putative poplar PtCNL were heterologously expressed in *Escherichia coli* as His<sub>6</sub>-tag fusion proteins and recombinant proteins were purified using affinity chromatography. Purified proteins were incubated with the potential substrates listed plus CoA and ATP. Reaction products were analyzed using liquid chromatography/tandem mass spectrometry (LC-MS/MS). Enzymatic activity is displayed as percentage of used substrate. Means and SE are given (n = 3).

| <b>substrate</b>            | <b>PtCNL1</b> | <b>PtCNL4</b> | <b>PtCNL5</b> | <b>PtCNL6</b> | <b>PtCNL7</b> |
|-----------------------------|---------------|---------------|---------------|---------------|---------------|
| <i>trans</i> -cinnamic acid | 98.5 ± 0.6    | 98.5 ± 0.7    | 51.0 ± 3.0    | 0.2 ± 0.2     | 41.1 ± 3.0    |
| 2-hydroxycinnamic acid      | 99.6 ± 0.3    | 98.1 ± 0.9    | 42.2 ± 1.0    | 1.6 ± 1.1     | 46.8 ± 3.5    |
| 4-hydroxycinnamic acid      | 42.7 ± 1.2    | 38.9 ± 1.9    | 56.2 ± 0.4    | 1.4 ± 1.4     | 75.0 ± 3.7    |
| caffeic acid                | 11.0 ± 0.7    | 8.0 ± 0.7     | 16.9 ± 1.0    | 0.2 ± 0.1     | 4.7 ± 0.5     |
| ferulic acid                | 8.1 ± 0.6     | 7.0 ± 1.0     | 21.4 ± 0.5    | 2.0 ± 0.7     | 10.1 ± 0.6    |
| benzoic acid                | 1.8 ± 0.4     | 3.1 ± 1.2     | 21.0 ± 1.2    | 5.0 ± 1.8     | 7.5 ± 0.5     |

**Supplemental Table S9. Enzymatic activity of *Populus trichocarpa* cinnamoyl-CoA hydratases/dehydrogenases (PtCHD) assayed with different substrates.** Putative poplar PtCHD were heterologously expressed in *Escherichia coli* as His<sub>6</sub>-tag fusion proteins and recombinant proteins were purified using affinity chromatography. Purified proteins were incubated with its potential substrates listed and NAD<sup>+</sup>. Reaction products were analyzed using liquid chromatography/tandem mass spectrometry (LC-MS/MS). Enzymatic activity is displayed as percentage of used substrate. Means and SE are given (n = 3).

| <b>substrate</b>       | <b>PtCHD1</b> | <b>PtCHD2</b> | <b>PtCHD3</b> |
|------------------------|---------------|---------------|---------------|
| cinnamoyl-CoA          | 78.2 ± 1.7    | 8.5 ± 0.9     | 2.0 ± 1.0     |
| 2-hydroxycinnamoyl-CoA | 98.1 ± 0.1    | 6.9 ± 0.4     | 33.6 ± 0.6    |
| 4-hydroxycinnamoyl-CoA | 97.2 ± 0.1    | 2.5 ± 0.7     | 1.8 ± 1.2     |

**Supplemental Table S10. Enzymatic activity of *Populus trichocarpa* 3-ketoacyl-CoA thiolases (PtKAT) assayed with different substrates.** Putative poplar PtKAT were heterologously expressed in *Escherichia coli* as His<sub>6</sub>-tag fusion proteins and recombinant proteins were purified using affinity chromatography. Purified proteins were incubated in combined assays with PtCHD1, its potential substrates listed, and the cosubstrates CoA and NAD<sup>+</sup>. Reaction products were analyzed using liquid chromatography/tandem mass spectrometry (LC-MS/MS). Enzymatic activity is displayed as intensity of the produced acetyl-CoA. Means and SE are given (n = 3). nd, not detected.

| substrate                       | PtKAT1                 | PtKAT2                 | PtKAT3                 |
|---------------------------------|------------------------|------------------------|------------------------|
| cinnamoyl-CoA + PtCHD1          | 3.51E+06 ±<br>5.56E+04 | 3.61E+06 ±<br>7.12E+04 | 8.52E+03 ±<br>2.66e+02 |
| 2-hydroxycinnamoyl-CoA + PtCHD1 | nd                     | nd                     | nd                     |
| 4-hydroxycinnamoyl-CoA + PtCHD1 | 2.65E+06 ±<br>5.29E+04 | 2.59E+06 ±<br>5.97E+04 | nd                     |

**Supplemental Table S11. Enzymatic activity of *Populus trichocarpa* 3-ketoacyl-CoA thiolases (PtKAT) assayed with different substrates.** Putative poplar PtKAT were heterologously expressed in *Escherichia coli* as His<sub>6</sub>-tag fusion proteins and recombinant proteins were purified using affinity chromatography. Purified proteins were incubated in combined assays with PtCHD1, its potential substrates listed, and the cosubstrates CoA and NAD<sup>+</sup>. Reaction products were analyzed using liquid chromatography/tandem mass spectrometry (LC-MS/MS). Enzymatic activity is displayed as intensity of the produced aromatic CoA ester product. Means and SE are given (n = 3). nd, not detected.

| substrate                       | PtKAT1     | PtKAT2     | PtKAT3     |
|---------------------------------|------------|------------|------------|
| cinnamoyl-CoA + PtCHD1          | 2.50E+06 ± | 2.56E+06 ± | 4.45E+03 ± |
|                                 | 2.91E+04   | 6.39E+04   | 3.17E+02   |
| 2-hydroxycinnamoyl-CoA + PtCHD1 | nd         | nd         | nd         |
| 4-hydroxycinnamoyl-CoA + PtCHD1 | 1.34E+05 ± | 1.32E+05 ± | nd         |
|                                 | 9.56E+02   | 2.27E+03   |            |

**Supplemental Table S12. Volatiles (ng g<sup>-1</sup> h<sup>-1</sup> fresh weight) emitted from *Chrysomela populi*-damaged *Populus x canescens* leaves of *cinnamate-CoA ligase (CNL1 and 4)* knockdown (RNAi), empty vector (EV), and wild-type (WT) trees.** Compounds were collected for 6 h using a push-pull system and Poropak filter. Eluates were analyzed using GC-MS and quantified by GC-FID. Means and SE (n = 4 biological replicates) are given. Differences between WT/EV and RNAi knockdown lines were analyzed by Student's *t*-test (ST) or Mann-Whitney Rank Sum Test (MW).

| compound                            | WT/EV        | RNAi          | P-value | t-value/T-value |
|-------------------------------------|--------------|---------------|---------|-----------------|
| <b><i>Nitrogenous compounds</i></b> |              |               |         |                 |
| benzyl cyanide                      | 11.17 ± 1.59 | 6.67 ± 1.39   | 0.082   | -2.087 (ST)     |
| indole                              | 11.89 ± 2.21 | 7.76 ± 1.65   | 0.185   | -1.499 (ST)     |
| <b><i>Green leaf volatiles</i></b>  |              |               |         |                 |
| <i>cis</i> -3-hexenyl acetate       | 19.71 ± 3.72 | 12.51 ± 1.98  | 0.139   | -1.706 (ST)     |
| <b><i>Monoterpenoids</i></b>        |              |               |         |                 |
| ( <i>E</i> )-β-ocimene              | 41.27 ± 5.57 | 20.01 ± 3.41  | 0.017   | -3.258 (ST)     |
| <b><i>Sesquiterpenoids</i></b>      |              |               |         |                 |
| germacrene D                        | 92.08 ± 8.39 | 81.56 ± 10.65 | 0.467   | -0.776 (ST)     |
| ( <i>E</i> )-β-caryophyllene        | 20.70 ± 2.07 | 14.45 ± 2.04  | 0.075   | -2.149 (ST)     |
| ( <i>E,E</i> )-α-farnesene          | 86.51 ± 8.77 | 47.20 ± 4.16  | 0.029   | 10.000 (MW)     |
| unidentified sesquiterpene 1        | 1.74 ± 0.10  | 1.61 ± 0.26   | 0.650   | -0.477 (ST)     |
| unidentified sesquiterpene 2        | 1.14 ± 0.04  | 0.94 ± 0.10   | 0.103   | -1.920 (ST)     |
| unidentified sesquiterpene 3        | 3.58 ± 0.31  | 2.62 ± 0.35   | 0.084   | -2.067 (ST)     |

**Supplemental Table S13. Volatiles (ng g<sup>-1</sup> h<sup>-1</sup> fresh weight) emitted from *Chrysomela populi*-damaged *Populus x canescens* leaves of *cinnamate-CoA ligase (CNL1 and 4)* knockdown (RNAi), empty vector (EV), and wild-type (WT) trees.** Compounds were collected for 6 h using a push-pull system and Poropak filter. Eluates were analyzed using GC-MS and quantified by GC-FID. Means and SE (n = 3-6 technical replicates) are given.

| line   | benzyl cyanide   | indole           | <i>cis</i> -3-hexenyl acetate | ( <i>E</i> )- $\beta$ -ocimene | germacrene D       |
|--------|------------------|------------------|-------------------------------|--------------------------------|--------------------|
| WT     | 12.16 $\pm$ 4.38 | 9.00 $\pm$ 2.60  | 26.86 $\pm$ 11.72             | 28.34 $\pm$ 6.48               | 84.82 $\pm$ 17.31  |
| EV-1   | 14.43 $\pm$ 4.33 | 17.90 $\pm$ 0.54 | 23.98 $\pm$ 11.73             | 46.28 $\pm$ 15.47              | 105.64 $\pm$ 4.38  |
| EV-2   | 11.25 $\pm$ 5.00 | 12.50 $\pm$ 4.97 | 10.03 $\pm$ 4.41              | 36.62 $\pm$ 13.55              | 106.09 $\pm$ 21.04 |
| EV-3   | 6.84 $\pm$ 1.16  | 8.17 $\pm$ 0.78  | 17.96 $\pm$ 3.95              | 53.84 $\pm$ 12.88              | 71.76 $\pm$ 9.73   |
| RNAi-1 | 10.70 $\pm$ 4.18 | 12.53 $\pm$ 4.84 | 9.26 $\pm$ 1.93               | 16.28 $\pm$ 3.32               | 75.87 $\pm$ 5.23   |
| RNAi-2 | 5.54 $\pm$ 3.79  | 5.08 $\pm$ 3.21  | 8.99 $\pm$ 3.96               | 14.87 $\pm$ 6.35               | 69.37 $\pm$ 28.52  |
| RNAi-3 | 6.52 $\pm$ 2.15  | 7.26 $\pm$ 2.35  | 16.63 $\pm$ 8.04              | 29.90 $\pm$ 10.54              | 113.08 $\pm$ 37.19 |
| RNAi-4 | 4.28 $\pm$ 0.84  | 6.17 $\pm$ 0.37  | 15.18 $\pm$ 6.73              | 18.99 $\pm$ 3.50               | 67.91 $\pm$ 12.73  |



**Supplemental Table S13. continued**

| <b>line</b>   | <b>(E)-<math>\beta</math>-<br/>caryophyllene</b> | <b>(E,E)-<math>\alpha</math>-<br/>farnesene</b> | <b>unidentified<br/>sesquiterpene 1</b> | <b>unidentified<br/>sesquiterpene 2</b> | <b>unidentified<br/>sesquiterpene 3</b> |
|---------------|--------------------------------------------------|-------------------------------------------------|-----------------------------------------|-----------------------------------------|-----------------------------------------|
| <b>WT</b>     | 16.63 $\pm$ 3.37                                 | 69.44 $\pm$ 17.17                               | 1.69 $\pm$ 0.31                         | 1.11 $\pm$ 0.19                         | 2.89 $\pm$ 0.57                         |
| <b>EV-1</b>   | 24.55 $\pm$ 5.21                                 | 106.21 $\pm$ 11.71                              | 1.88 $\pm$ 0.15                         | 1.21 $\pm$ 0.11                         | 4.33 $\pm$ 0.95                         |
| <b>EV-2</b>   | 17.66 $\pm$ 3.11                                 | 74.25 $\pm$ 24.73                               | 1.92 $\pm$ 0.44                         | 1.20 $\pm$ 0.25                         | 3.30 $\pm$ 0.56                         |
| <b>EV-3</b>   | 23.95 $\pm$ 5.35                                 | 96.16 $\pm$ 9.46                                | 1.48 $\pm$ 0.18                         | 1.05 $\pm$ 0.13                         | 3.81 $\pm$ 0.87                         |
| <b>RNAi-1</b> | 10.46 $\pm$ 2.07                                 | 37.95 $\pm$ 15.12                               | 1.37 $\pm$ 0.12                         | 0.77 $\pm$ 0.06                         | 1.96 $\pm$ 0.37                         |
| <b>RNAi-2</b> | 11.81 $\pm$ 4.55                                 | 43.68 $\pm$ 32.23                               | 1.25 $\pm$ 0.47                         | 0.81 $\pm$ 0.26                         | 2.19 $\pm$ 0.87                         |
| <b>RNAi-3</b> | 19.37 $\pm$ 7.36                                 | 57.32 $\pm$ 20.66                               | 2.38 $\pm$ 1.03                         | 1.20 $\pm$ 0.36                         | 3.49 $\pm$ 1.28                         |
| <b>RNAi-4</b> | 16.18 $\pm$ 5.84                                 | 49.87 $\pm$ 27.86                               | 1.44 $\pm$ 0.16                         | 0.97 $\pm$ 0.03                         | 2.83 $\pm$ 0.98                         |

**Supplemental Table S14. Content of non-polar benzenoid compounds ( $\mu\text{g/g}$  fresh weight) in *Chrysomela populi*-damaged *Populus x canescens* leaves of *cinnamate-CoA ligase (CNL1 and 4)* knockdown (RNAi), empty vector (EV), and wild-type (WT) trees. Compounds were extracted with hexane from fresh plant material and analyzed using GC-MS/GC-FID. NA, not available; nd, not detected. Means and SE (n = 4 biological replicates) are given. Differences between WT/EV and RNAi knockdown lines were analyzed by Student's *t*-test (ST).**

| <b>compound</b>        | <b>WT/EV</b>     | <b>RNAi</b>      | <b>P-value</b> | <b>t-value</b> |
|------------------------|------------------|------------------|----------------|----------------|
| <b>benzaldehyde</b>    | 0.87 $\pm$ 0.18  | 0.55 $\pm$ 0.08  | 0.154          | -1.633 (ST)    |
| <b>benzylalcohol</b>   | 0.25 $\pm$ 0.04  | 0.17 $\pm$ 0.03  | 0.196          | -1.456 (ST)    |
| <b>salicylaldehyde</b> | 30.15 $\pm$ 3.19 | 24.18 $\pm$ 2.63 | 0.199          | -1.444 (ST)    |
| <b>benzyl benzoate</b> | 0.56 $\pm$ 0.06  | 0.35 $\pm$ 0.05  | 0.037          | -2.670 (ST)    |

**Supplemental Table S15. Content of non-polar benzenoid compounds ( $\mu\text{g/g}$  fresh weight) in *Chrysomela populi*-damaged *Populus x canescens* leaves of *cinnamate-CoA ligase* (*CNL1* and *4*) knockdown (RNAi), empty vector (EV), and wild-type (WT) trees. Compounds were extracted with hexane from fresh plant material and analyzed using GC-MS/GC-FID. NA, not available; nd, not detected. Means and SE (n = 3-6 technical replicates) are given.**

| <b>line</b>   | <b>benzaldehyde</b> | <b>benzylalcohol</b> | <b>salicylaldehyde</b> | <b>benzyl benzoate</b> |
|---------------|---------------------|----------------------|------------------------|------------------------|
| <b>WT</b>     | 0.70 $\pm$ 0.16     | 0.22 $\pm$ 0.06      | 24.84 $\pm$ 7.43       | 0.43 $\pm$ 0.08        |
| <b>EV-1</b>   | 0.94 $\pm$ 0.09     | 0.23 $\pm$ 0.03      | 28.77 $\pm$ 2.55       | 0.68 $\pm$ 0.15        |
| <b>EV-2</b>   | 0.51 $\pm$ 0.08     | 0.18 $\pm$ 0.04      | 27.59 $\pm$ 7.79       | 0.48 $\pm$ 0.12        |
| <b>EV-3</b>   | 1.32 $\pm$ 0.33     | 0.36 $\pm$ 0.10      | 39.41 $\pm$ 9.89       | 0.66 $\pm$ 0.09        |
| <b>RNAi-1</b> | 0.37 $\pm$ 0.10     | 0.11 $\pm$ 0.03      | 19.55 $\pm$ 4.37       | 0.23 $\pm$ 0.05        |
| <b>RNAi-2</b> | 0.51 $\pm$ 0.11     | 0.15 $\pm$ 0.02      | 23.41 $\pm$ 3.49       | 0.36 $\pm$ 0.10        |
| <b>RNAi-3</b> | 0.58 $\pm$ 0.13     | 0.17 $\pm$ 0.06      | 22.07 $\pm$ 5.36       | 0.35 $\pm$ 0.11        |
| <b>RNAi-4</b> | 0.75 $\pm$ 0.23     | 0.27 $\pm$ 0.09      | 31.69 $\pm$ 7.88       | 0.47 $\pm$ 0.15        |

**Supplemental Table S16. Benzenoid carboxylic acid content ( $\mu\text{g/g}$  dry weight) in *Chrysomela populi*-damaged *Populus x canescens* leaves of *cinnamate-CoA ligase (CNL1 and 4)* knockdown (RNAi), empty vector (EV), and wild-type (WT) trees. Compounds were extracted with methanol from freeze-dried plant material and analyzed using LC-MS/MS. BA, benzoic acid; NA, not available; nd, not detected; nq, not quantified due to trace amounts. Means and SE (n = 4 biological replicates) are given. Differences between WT/EV and RNAi knockdown lines were analyzed by Student's *t*-test (ST).**

| <b>compound</b>          | <b>WT/EV</b>    | <b>RNAi</b>     | <b>P-value</b> | <b>t-value</b> |
|--------------------------|-----------------|-----------------|----------------|----------------|
| <b>BA</b>                | nq              | nq              | NA             | NA             |
| <b>salicylic acid</b>    | nq              | nq              | NA             | NA             |
| <b>3-hydroxy BA</b>      | nd              | nd              | NA             | NA             |
| <b>4-hydroxy BA</b>      | 2.30 $\pm$ 0.31 | 1.69 $\pm$ 0.25 | 0.175          | -1.538 (ST)    |
| <b>2,3- dihydroxy BA</b> | 1.71 $\pm$ 0.28 | 1.29 $\pm$ 0.21 | 0.28           | -1.187 (ST)    |
| <b>2,5- dihydroxy BA</b> | nd              | nd              | NA             | NA             |
| <b>gallic acid</b>       | nd              | nd              | NA             | NA             |

**Supplemental Table S17. Benzenoid carboxylic acid content ( $\mu\text{g/g}$  dry weight) in *Chrysomela populi*-damaged *Populus x canescens* leaves of *cinnamate-CoA ligase* (*CNL1* and *4*) knockdown (RNAi), empty vector (EV), and wild-type (WT) trees. Compounds were extracted with methanol from freeze-dried plant material and analyzed using LC-MS/MS. BA, benzoic acid; NA, not available; nd, not detected; nq, not quantified due to trace amounts. Means and SE (n = 3-6 technical replicates) are given.**

| line   | BA | salicylic acid | 3-hydroxy BA | 4-hydroxy BA    | 2,3-dihydroxy BA | 2,5-dihydroxy BA | gallic acid |
|--------|----|----------------|--------------|-----------------|------------------|------------------|-------------|
| WT     | nq | nq             | nd           | 1.95 $\pm$ 0.41 | 1.31 $\pm$ 0.28  | nd               | nd          |
| EV-1   | nq | nq             | nd           | 2.66 $\pm$ 0.43 | 2.02 $\pm$ 0.36  | nd               | nd          |
| EV-2   | nq | nq             | nd           | 1.62 $\pm$ 0.56 | 1.16 $\pm$ 0.24  | nd               | nd          |
| EV-3   | nq | nq             | nd           | 2.97 $\pm$ 0.40 | 2.35 $\pm$ 0.43  | nd               | nd          |
| RNAi-1 | nq | nq             | nd           | 1.19 $\pm$ 0.28 | 0.86 $\pm$ 0.16  | nd               | nd          |
| RNAi-2 | nq | nq             | nd           | 1.55 $\pm$ 0.59 | 1.25 $\pm$ 0.43  | nd               | nd          |
| RNAi-3 | nq | nq             | nd           | 1.62 $\pm$ 0.37 | 1.16 $\pm$ 0.28  | nd               | nd          |
| RNAi-4 | nq | nq             | nd           | 2.38 $\pm$ 0.80 | 1.88 $\pm$ 0.57  | nd               | nd          |

**Supplemental Table S18. Phenylpropanoid carboxylic acid content ( $\mu\text{g/g}$  dry weight) in *Chrysomela populi*-damaged *Populus x canescens* leaves of *cinnamate-CoA ligase (CNL1 and 4)* knockdown (RNAi), empty vector (EV), and wild-type (WT) trees. Compounds were extracted with methanol from freeze-dried plant material and analyzed using LC-MS/MS. NA, not available; nd, not detected. Means and SE (n = 4 biological replicates) are given. Differences between WT/EV and RNAi knockdown lines were analyzed by Student's *t*-test (ST).**

| <b>compound</b>                | <b>WT/EV</b>    | <b>RNAi</b>     | <b>P-value</b> | <b>t-value</b> |
|--------------------------------|-----------------|-----------------|----------------|----------------|
| <b>cinnamic acid</b>           | 4.56 $\pm$ 0.37 | 5.02 $\pm$ 0.40 | 0.431          | 0.845 (ST)     |
| <b>2-hydroxy cinnamic acid</b> | 1.56 $\pm$ 0.04 | 1.39 $\pm$ 0.03 | 0.015          | -3.378 (ST)    |
| <b>4-hydroxy cinnamic acid</b> | 1.35 $\pm$ 0.18 | 1.31 $\pm$ 0.17 | 0.901          | -0.130 (ST)    |
| <b>caffeic acid</b>            | 2.39 $\pm$ 0.33 | 1.70 $\pm$ 0.28 | 0.158          | -1.613 (ST)    |
| <b>ferulic acid</b>            | nd              | nd              | NA             | NA             |

**Supplemental Table S19. Phenylpropanoid carboxylic acid content ( $\mu\text{g/g}$  dry weight) in *Chrysomela populi*-damaged *Populus x canescens* leaves of *cinnamate-CoA ligase (CNL1 and 4)* knockdown (RNAi), empty vector (EV), and wild-type (WT) trees. Compounds were extracted with methanol from freeze-dried plant material and analyzed using LC-MS/MS. NA, not available; nd, not detected. Means and SE (n = 3-6 technical replicates) are given.**

| line   | cinnamic acid   | 2-hydroxy cinnamic acid | 4-hydroxy cinnamic acid | caffeic acid    | ferulic acid |
|--------|-----------------|-------------------------|-------------------------|-----------------|--------------|
| WT     | 4.70 $\pm$ 0.99 | 1.60 $\pm$ 0.08         | 0.98 $\pm$ 0.13         | 1.73 $\pm$ 0.41 | nd           |
| EV-1   | 4.47 $\pm$ 0.17 | 1.63 $\pm$ 0.14         | 1.44 $\pm$ 0.19         | 2.90 $\pm$ 0.54 | nd           |
| EV-2   | 5.43 $\pm$ 1.53 | 1.45 $\pm$ 0.15         | 1.14 $\pm$ 0.27         | 1.93 $\pm$ 0.24 | nd           |
| EV-3   | 3.65 $\pm$ 0.66 | 1.56 $\pm$ 0.07         | 1.82 $\pm$ 0.24         | 3.01 $\pm$ 0.43 | nd           |
| RNAi-1 | 4.43 $\pm$ 0.62 | 1.34 $\pm$ 0.16         | 1.19 $\pm$ 0.38         | 1.08 $\pm$ 0.29 | nd           |
| RNAi-2 | 4.23 $\pm$ 0.40 | 1.47 $\pm$ 0.09         | 1.07 $\pm$ 0.33         | 1.45 $\pm$ 0.53 | nd           |
| RNAi-3 | 5.75 $\pm$ 0.56 | 1.34 $\pm$ 0.13         | 1.17 $\pm$ 0.28         | 1.87 $\pm$ 0.41 | nd           |
| RNAi-4 | 5.68 $\pm$ 1.09 | 1.41 $\pm$ 0.19         | 1.82 $\pm$ 0.56         | 2.38 $\pm$ 0.70 | nd           |

**Supplemental Table S20. HPLC gradients used for separation and analysis of metabolites.**

| <b>gradient</b> | <b>time (min)</b> | <b>solvent A (%)</b> | <b>solvent B (%)</b> |
|-----------------|-------------------|----------------------|----------------------|
| gradient A      | 0.00              | 95.0                 | 5.0                  |
|                 | 0.50              | 95.0                 | 5.0                  |
|                 | 6.00              | 62.6                 | 37.4                 |
|                 | 6.01              | 20.0                 | 80.0                 |
|                 | 7.50              | 0.0                  | 100.0                |
|                 | 9.50              | 0.0                  | 100.0                |
|                 | 9.52              | 95.0                 | 5.0                  |
|                 | 12.00             | 95.0                 | 5.0                  |
| gradient B      | 0.00              | 90.0                 | 10.0                 |
|                 | 0.50              | 90.0                 | 10.0                 |
|                 | 4.00              | 10.0                 | 90.0                 |
|                 | 4.02              | 0.0                  | 100.0                |
|                 | 4.50              | 0.0                  | 100.0                |
|                 | 4.51              | 90.0                 | 10.0                 |
|                 | 7.00              | 90.0                 | 10.0                 |
| gradient C      | 0.00              | 95.0                 | 5.0                  |
|                 | 0.50              | 95.0                 | 5.0                  |
|                 | 9.50              | 42.0                 | 58.0                 |
|                 | 9.52              | 0.0                  | 100.0                |
|                 | 11.00             | 0.0                  | 100.0                |
|                 | 11.10             | 95.0                 | 5.0                  |
|                 | 14.00             | 95.0                 | 5.0                  |
| gradient D      | 0.00              | 90.0                 | 10.0                 |
|                 | 3.00              | 60.0                 | 40.0                 |
|                 | 3.01              | 0.0                  | 100.0                |
|                 | 4.50              | 0.0                  | 100.0                |
|                 | 4.51              | 90.0                 | 10.0                 |
|                 | 7.00              | 90.0                 | 10.0                 |
| gradient E      | 0.00              | 98.0                 | 2.0                  |
|                 | 1.00              | 98.0                 | 2.0                  |
|                 | 4.00              | 60.0                 | 40.0                 |
|                 | 4.01              | 0.0                  | 100.0                |
|                 | 5.50              | 0.0                  | 100.0                |
|                 | 5.51              | 98.0                 | 2.0                  |
|                 | 8.00              | 98.0                 | 2.0                  |



**Supplemental Table S21. Parameters used for LC-MS/MS analysis.** Details of the HPLC gradients are given in Supplemental Table S20. CE, collision energy; DP, declustering potential; Q1, quadrupole 1; Q3, quadrupole 3.

| compound                                          | Q1<br>(m/z) | Q3<br>(m/z) | DP (V) | CE (V) | mode | HPLC<br>gradient |
|---------------------------------------------------|-------------|-------------|--------|--------|------|------------------|
| phenylalanine                                     | 164         | 147         | -30    | -18    | neg  | A                |
| tyrosine                                          | 180         | 163         | -30    | -18    | neg  | A                |
| tryptophan                                        | 202.9       | 186         | -30    | -19    | neg  | A                |
| <i>trans</i> -cinnamic acid                       | 147         | 102.8       | -30    | -16    | neg  | A/B              |
| 2-hydroxycinnamic acid                            | 163         | 118.9       | -30    | -20    | neg  | A/B              |
| 4-hydroxycinnamic acid                            | 163         | 118.9       | -30    | -20    | neg  | A/B              |
| caffeic acid                                      | 179         | 134.9       | -30    | -22    | neg  | A/B              |
| ferulic acid                                      | 193.1       | 133.9       | -30    | -22    | neg  | A/B              |
| gallic acid                                       | 169         | 125         | -30    | -18    | neg  | A/B              |
| benzoic acid                                      | 121         | 121         | -30    | -5     | neg  | A/B              |
| salicylic acid                                    | 137         | 93          | -30    | -22    | neg  | A/B              |
| 3-hydroxybenzoic acid                             | 137         | 93          | -30    | -16    | neg  | A/B              |
| 4-hydroxybenzoic acid                             | 137         | 93          | -30    | -20    | neg  | A/B              |
| 2,3-dihydroxybenzoic acid                         | 153         | 108/109     | -30    | -28    | neg  | A/B              |
| 2,5-dihydroxybenzoic acid                         | 153         | 108         | -30    | -28    | neg  | A/B              |
| salicin                                           | 331         | 122.8       | -60    | -18    | neg  | A                |
| salicin-7-sulfate                                 | 365         | 97          | -60    | -25    | neg  | A                |
| salirepin                                         | 301         | 139         | -60    | -18    | neg  | A                |
| salirepin-7-sulfate                               | 381         | 97          | -60    | -55    | neg  | A                |
| salicortin                                        | 422.8       | 123.1       | -60    | -7,5   | neg  | A                |
| homaloside D                                      | 543         | 139         | -60    | -30    | neg  | A                |
| tremulacin/6-O'-benzoysalicortin                  | 527.1       | 123.2       | -60    | -34    | neg  | A                |
| D <sub>7</sub> -cinnamic acid                     | 154         | 110         | -60    | -16    | neg  | A                |
| D <sub>6</sub> -2-hydroxycinnamic acid            | 169         | 125         | -60    | -20    | neg  | A                |
| D <sub>6</sub> -4-hydroxycinnamic acid            | 169         | 125         | -60    | -20    | neg  | A                |
| D <sub>5</sub> -caffeic acid                      | 184         | 140         | -60    | -22    | neg  | A                |
| D <sub>5</sub> -ferulic acid                      | 198         | 139         | -60    | -22    | neg  | A                |
| D <sub>5</sub> -benzoic acid                      | 126         | 126         | -60    | -16    | neg  | A                |
| D <sub>4</sub> -salicylic acid                    | 141         | 97          | -60    | -22    | neg  | A                |
| D <sub>4</sub> -3-hydroxybenzoic acid             | 141         | 97          | -60    | -16    | neg  | A                |
| D <sub>4</sub> -4-hydroxybenzoic acid             | 141         | 97          | -60    | -20    | neg  | A                |
| D <sub>3</sub> -2,3-dihydroxybenzoic acid         | 156         | 112         | -60    | -28    | neg  | A                |
| D <sub>3</sub> -2,5-dihydroxybenzoic acid         | 156         | 111         | -60    | -28    | neg  | A                |
| D <sub>2</sub> -gallic acid                       | 171         | 127         | -60    | -18    | neg  | A                |
| D <sub>4</sub> -salicin                           | 335         | 127         | -60    | -18    | neg  | A                |
| D <sub>4</sub> -salicin-7-sulfate                 | 369         | 97          | -60    | -25    | neg  | A                |
| D <sub>3</sub> -salirepin                         | 304         | 142         | -60    | -18    | neg  | A                |
| D <sub>3</sub> -salirepin-7-sulfate               | 384         | 97          | -60    | -55    | neg  | A                |
| D <sub>8</sub> -salicortin                        | 431         | 127         | -60    | -30    | neg  | A                |
| D <sub>12</sub> -homaloside D                     | 555         | 143         | -60    | -30    | neg  | A                |
| D <sub>13</sub> -tremulacin/6-O'-benzoysalicortin | 540         | 127         | -60    | -34    | neg  | A                |

**Supplemental Table S21. continued**

| <b>compound</b>                                       | <b>Q1<br/>(m/z)</b> | <b>Q3<br/>(m/z)</b> | <b>DP (V)</b> | <b>CE (V)</b> | <b>mode</b> | <b>HPLC<br/>gradient</b> |
|-------------------------------------------------------|---------------------|---------------------|---------------|---------------|-------------|--------------------------|
| salicylic acid                                        | 136.9               | 93                  | -20           | -22           | neg         | C                        |
| jasmonic acid                                         | 209.1               | 59                  | -20           | -24           | neg         | C                        |
| abscisic acid                                         | 263                 | 153.2               | -20           | -22           | neg         | C                        |
| (-)-jasmonoyl-L-isoleucine                            | 322.2               | 130.1               | -50           | -30           | neg         | C                        |
| (+)-7- <i>iso</i> -jasmonoyl-L-isoleucine             | 322.2               | 130.1               | -50           | -30           | neg         | C                        |
| 12-oxophytodienoic acid                               | 290.9               | 165.1               | -20           | -24           | neg         | C                        |
| 12-hydroxyjasmonic acid                               | 225.1               | 59                  | -20           | -24           | neg         | C                        |
| 12-hydroxyjasmonic acid-<br>isoleucine                | 338.1               | 130.1               | -50           | -30           | neg         | C                        |
| 12-carboxyjasmonic acid-<br>isoleucine                | 352.1               | 130.1               | -50           | -30           | neg         | C                        |
| D <sub>4</sub> -salicylic acid                        | 140.9               | 97                  | -20           | -22           | neg         | C                        |
| D <sub>6</sub> -abscisic acid                         | 269                 | 159.2               | -20           | -22           | neg         | C                        |
| D <sub>6</sub> -jasmonic acid                         | 215                 | 59                  | -20           | -24           | neg         | C                        |
| D <sub>6</sub> -jasmonic-acid isoleucine              | 328.2               | 130.1               | -50           | -30           | neg         | C                        |
| cinnamoyl-CoA                                         | 896.2               | 79.0                | -30           | -110          | neg         | D                        |
| hydroxyl-cinnamoyl-CoA                                | 912.2               | 79.0                | -30           | -110          | neg         | D                        |
| caffeoyl-CoA                                          | 928.3               | 79.0                | -30           | -110          | neg         | D                        |
| feruloyl-CoA                                          | 942.2               | 79.0                | -30           | -110          | neg         | D                        |
| benzoyl-CoA                                           | 870.2               | 79.0                | -30           | -110          | neg         | D                        |
| 3-oxo-3-phenylpropanoyl-CoA                           | 912.3               | 79.0                | -30           | -110          | neg         | D                        |
| 3-oxo-3-(2-hydroxy)-<br>phenylpropanoyl-CoA           | 928.2               | 79                  | -30           | -110          | neg         | D                        |
| 3-oxo-3-(4-hydroxy)-<br>phenylpropanoyl-CoA           | 928.2               | 79.0                | -30           | -110          | neg         | D                        |
| 3-oxo-3-(3,4-dihydroxy)-<br>phenylpropanoyl-CoA       | 944.2               | 79.0                | -30           | -110          | neg         | D                        |
| 3-oxo-3-(4-hydroxy-3-methoxy)-<br>phenylpropanoyl-CoA | 958.2               | 79.0                | -30           | -110          | neg         | D                        |
| acetyl-CoA                                            | 808.2               | 79                  | -30           | -110          | neg         | E                        |

**Supplemental Table S22. Oligonucleotides used for the amplification of full-length *Populus trichocarpa* (Pt) cinnamate-CoA ligases (CNL), cinnamoyl-CoA hydratases/dehydrogenases (CHD), and 3-ketoacyl-CoA thiolases (KAT).** \*, forward (fwd) oligonucleotide used for the amplification of *Potri.017G138400* (*PtCNL1*) and *Potri.T116500* (*PtCNL3*), #, reverse (rev) oligonucleotide used for the amplification of *Potri.006G036200* (*PtCNL6*) and *Potri.006G036300* (*PtCNL7*).

| oligonucleotides  | gene                    | sequence 5' – 3'          | usage                  |
|-------------------|-------------------------|---------------------------|------------------------|
| <i>PtCNL1fwd*</i> | <i>Potri.017G138400</i> | CACCATGGATCAACTACTAAAATGC | cloning/pET100/D-TOPO® |
| <i>PtCNL4fwd</i>  | <i>Potri.004G082000</i> | CACCATGGATCAACTACAAAAATGT | cloning/pET100/D-TOPO® |
| <i>PtCNL5fwd</i>  | <i>Potri.016G034800</i> | CACCATGGATCAACTTCCAAAATGT | cloning/pET100/D-TOPO® |
| <i>PtCNL6fwd</i>  | <i>Potri.006G036200</i> | CACCATGGATCAGCTTCCAAAGTGT | cloning/pET100/D-TOPO® |
| <i>PtCNL7fwd</i>  | <i>Potri.006G036300</i> | CACCATGGATCAGCTTCCAAAATGT | cloning/pET100/D-TOPO® |
| <i>PtCNL1rev</i>  | <i>Potri.017G138400</i> | TCAAAGACGAGATAGAGCAAG     | cloning/pET100/D-TOPO® |
| <i>PtCNL3rev</i>  | <i>Potri.T116500</i>    | TCATGCATTGACAACAAAATT     | cloning/pET100/D-TOPO® |
| <i>PtCNL4rev</i>  | <i>Potri.004G082000</i> | TCAAAGACGAGACATAGCAAG     | cloning/pET100/D-TOPO® |
| <i>PtCNL5rev</i>  | <i>Potri.016G034800</i> | TCAAAGACGAGAGGAAGGAAC     | cloning/pET100/D-TOPO® |
| <i>PtCNL6rev#</i> | <i>Potri.006G036200</i> | TCAAAGACGAGACGAAGCAAC     | cloning/pET100/D-TOPO® |
| <i>PtCHD1fwd</i>  | <i>Potri.018G082900</i> | CACCATGGCTAAGCCTCACGTCACC | cloning/pET100/D-TOPO® |
| <i>PtCHD2fwd</i>  | <i>Potri.010G011900</i> | CACCATGGAAGGAAGCAGGACTAAG | cloning/pET100/D-TOPO® |
| <i>PtCHD3fwd</i>  | <i>Potri.008G220100</i> | CACCATGAAAGGAAGCAGGACCAAG | cloning/pET100/D-TOPO® |
| <i>PtCHD1rev</i>  | <i>Potri.018G082900</i> | CTACATGCGTGACCTTGACCC     | cloning/pET100/D-TOPO® |
| <i>PtCHD2rev</i>  | <i>Potri.010G011900</i> | TTACAGCCGAGACTTTGCTTGG    | cloning/pET100/D-TOPO® |
| <i>PtCHD3rev</i>  | <i>Potri.008G220100</i> | TTACAGCCGAGACTTCGCTTGC    | cloning/pET100/D-TOPO® |
| <i>PtKAT1fwd</i>  | <i>Potri.002G216400</i> | CACCATGGAGAAGGCATTTAACAGA | cloning/pET100/D-TOPO® |
| <i>PtKAT2fwd</i>  | <i>Potri.001G051900</i> | CACCATGGAGAAAGCAATCAACAGG | cloning/pET100/D-TOPO® |
| <i>PtKAT3fwd</i>  | <i>Potri.001G051800</i> | CACCATGGAGAAAGCAAGCAACAGG | cloning/pET100/D-TOPO® |
| <i>PtKAT1rev</i>  | <i>Potri.002G216400</i> | CTAACGAGCATCTTTTGACAG     | cloning/pET100/D-TOPO® |
| <i>PtKAT2rev</i>  | <i>Potri.001G051900</i> | CTATCGTGAATCCCTGGATAA     | cloning/pET100/D-TOPO® |
| <i>PtKAT3rev</i>  | <i>Potri.001G051800</i> | CTATCTTGAATCCTTGGATAA     | cloning/pET100/D-TOPO® |

**Supplemental Table S23. Oligonucleotides used for gene expression analysis of *Populus trichocarpa* (Pt) *cinnamate-CoA ligases* (CNL), *cinnamoyl-CoA hydratases/dehydrogenases* (CHD), and *3-ketoacyl-CoA thiolases* (KAT) by RT-qPCR.**

| <b>oligonucleotides</b> | <b>gene</b>             | <b>sequence 5' – 3'</b>   | <b>usage</b> |
|-------------------------|-------------------------|---------------------------|--------------|
| <i>PtCNL1fwd</i>        | <i>Potri.017G138400</i> | CTGATATTATCGCTTACTGC      | RT-qPCR      |
| <i>PtCNL3fwd</i>        | <i>Potri.T116500</i>    | CGAAATCACTTCCCCGGTTG      | RT-qPCR      |
| <i>PtCNL4fwd</i>        | <i>Potri.004G082000</i> | CCACCAGCCTCATTGCTTGA      | RT-qPCR      |
| <i>PtCNL5fwd</i>        | <i>Potri.016G034800</i> | TTGCTCAGCACAAGGTGACT      | RT-qPCR      |
| <i>PtCNL6fwd</i>        | <i>Potri.006G036200</i> | CAAACCAGAGGAGCGTAGGG      | RT-qPCR      |
| <i>PtCNL7fwd</i>        | <i>Potri.006G036300</i> | GGAAAAAGCTTCCCCGTTATATGG  | RT-qPCR      |
| <i>PtCNL1rev</i>        | <i>Potri.017G138400</i> | TTGCTTGGCAATATCTCATTG     | RT-qPCR      |
| <i>PtCNL3rev</i>        | <i>Potri.T116500</i>    | TCCTGCTGTGGAAGCTTGTT      | RT-qPCR      |
| <i>PtCNL4rev</i>        | <i>Potri.004G082000</i> | ACTGATCCTGCTGTGGAAGC      | RT-qPCR      |
| <i>PtCNL5rev</i>        | <i>Potri.016G034800</i> | GGTGCACCACCGACAAGTAT      | RT-qPCR      |
| <i>PtCNL6rev</i>        | <i>Potri.006G036200</i> | AACCTCCGTGAGGCCATAAG      | RT-qPCR      |
| <i>PtCNL7rev</i>        | <i>Potri.006G036300</i> | CTTGCAATTTCTGTATTGGCATTAC | RT-qPCR      |
| <i>PtCHD1fwd</i>        | <i>Potri.018G082900</i> | ATCTCAGAGAGGCGCAAACC      | RT-qPCR      |
| <i>PtCHD2fwd</i>        | <i>Potri.010G011900</i> | CGAGCCCCCAATCTAACACA      | RT-qPCR      |
| <i>PtCHD3fwd</i>        | <i>Potri.008G220100</i> | CAAGTTTGCTAGAGCACAAGC     | RT-qPCR      |
| <i>PtCHD1rev</i>        | <i>Potri.018G082900</i> | CTTGATGCTGCGGCACATTT      | RT-qPCR      |
| <i>PtCHD2rev</i>        | <i>Potri.010G011900</i> | AGGTGTCAGAACGCACAAGT      | RT-qPCR      |
| <i>PtCHD3rev</i>        | <i>Potri.008G220100</i> | GTGGACCAAGCTCTTGCTGA      | RT-qPCR      |
| <i>PtKAT1fwd</i>        | <i>Potri.002G216400</i> | AGTGCATGACAGTGAACGGC      | RT-qPCR      |
| <i>PtKAT2fwd</i>        | <i>Potri.001G051900</i> | CAAGAAGTTGGAGCTTGATCCA    | RT-qPCR      |
| <i>PtKAT3fwd</i>        | <i>Potri.001G051800</i> | GGATTGCCCCAACACATCGT      | RT-qPCR      |
| <i>PtKAT1rev</i>        | <i>Potri.002G216400</i> | CGCCATAACGCTGAGCAACA      | RT-qPCR      |
| <i>PtKAT2rev</i>        | <i>Potri.001G051900</i> | ACATTGACACCACCCGAAG       | RT-qPCR      |
| <i>PtKAT3rev</i>        | <i>Potri.001G051800</i> | GATGGGTAACCCTTTGCGCAT     | RT-qPCR      |

**Supplemental Table S24. Expression levels of potential housekeeping genes in undamaged (control) and *Chrysomela populi*-damaged (herbivory) *Populus trichocarpa* leaves.** The  $\Delta Cq$  means (n = 4) and the standard deviations (STDEV) are shown. *UBQ*, ubiquitin; *TUB*, tubulin; *HIS*, histone superfamily protein H3; *EF1 $\alpha$* , elongation factor 1 alpha; and *actin* (Ramírez-Carvajal et al., 2008; Xu et al., 2011; Wang et al., 2014).

| <b>treatment</b> | <b><i>UBQ</i></b> | <b><i>TUB</i></b> | <b><i>HIS</i></b> | <b><i>EF1-<math>\alpha</math></i></b> | <b><i>Actin</i></b> |
|------------------|-------------------|-------------------|-------------------|---------------------------------------|---------------------|
| control          | 19.50             | 23.65             | 20.92             | 22.17                                 | 22.54               |
| herbivory        | 19.55             | 23.69             | 20.99             | 22.29                                 | 22.43               |
| STDEV            | 0.04              | 0.03              | 0.04              | 0.08                                  | 0.07                |
